# Supplementary material for: Anharmonic coupling behind vibrational spectra of solvated ammonium: lighting up overtone states by Fermi resonance through tuning solvation environments
Source: Royal Society of Chemistry journal article supplement (doi:10.1039/d0cp03519j), 2020-01-01
Supplement: d0cp03519j1.pdf [file d0cp03519j1.pdf]

# Anharmonic coupling behind vibrational spectra of solvated ammonium: lighting up overtone states by Fermi resonance through tuning solvation environments

Chih-Kai Lin,<sup>a,\*</sup> Qian-Rui Huang,<sup>a</sup> and Jer-Lai Kuo<sup>a,\*</sup>

<sup>a</sup> Institute of Atomic and Molecular Sciences, Academia Sinica, Taipei 10617, Taiwan, ROC.

e-mail: ethenel@gmail.com (CKL), jlkuo@pub.iams.sinica.edu.tw (JLK)

## Electronic Supplementary Information

The following information contains optimized coordinates and geometric parameters, Hamiltonian matrices of vibrational quantum states, and other properties relevant to Fermi resonance of ammonium-centered clusters,  $\text{NH}_4^+ \dots X_n$ , where the attached species X include Ne, Ar, Kr,  $\text{H}_2\text{O}$ , and  $\text{NH}_3$ , and  $n = 1-5$ .

**Table S1.** Cartesian coordinates of  $\text{NH}_4^+ \dots X_n$  clusters optimized at the MP2/aug-cc-pVDZ level.

$\text{NH}_4^+$

|   |             |             |             |
|---|-------------|-------------|-------------|
| N | 0.00000000  | 0.00000000  | 0.00000000  |
| H | -0.00000000 | -0.00000000 | 1.02802758  |
| H | -0.00000000 | -0.96923370 | -0.34267586 |
| H | -0.83938100 | 0.48461685  | -0.34267586 |
| H | 0.83938100  | 0.48461685  | -0.34267586 |

$\text{NH}_4^+ \dots \text{Ne}$

|    |             |             |             |
|----|-------------|-------------|-------------|
| N  | -0.00000000 | -0.00000000 | -1.51827062 |
| H  | -0.00000000 | -0.00000000 | -0.49054062 |
| H  | 0.00000000  | 0.96804311  | -1.86156959 |
| H  | 0.83834993  | -0.48402156 | -1.86156959 |
| H  | -0.83834993 | -0.48402156 | -1.86156959 |
| Ne | 0.00000000  | 0.00000000  | 1.67031438  |

$\text{NH}_4^+ \dots \text{Ne}_2$

|   |            |             |            |
|---|------------|-------------|------------|
| N | 0.00000000 | 0.00000000  | 1.17648232 |
| H | 0.00000000 | 0.83955600  | 0.58423132 |
| H | 0.00000000 | -0.83955600 | 0.58423132 |
| H | 0.83785600 | -0.00000000 | 1.77013732 |

|    |             |             |             |
|----|-------------|-------------|-------------|
| H  | -0.83785600 | -0.00000000 | 1.77013732  |
| Ne | 0.00000000  | 2.61763200  | -0.64720568 |
| Ne | 0.00000000  | -2.61763200 | -0.64720568 |

NH<sub>4</sub><sup>+</sup>...Ne<sub>3</sub>

|    |             |             |             |
|----|-------------|-------------|-------------|
| N  | 0.00000000  | 0.00000000  | 0.76128627  |
| H  | 0.00000000  | 0.96856175  | 0.41990729  |
| H  | -0.83879908 | -0.48428087 | 0.41990729  |
| H  | 0.83879908  | -0.48428087 | 0.41990729  |
| H  | 0.00000000  | 0.00000000  | 1.78783627  |
| Ne | 0.00000000  | 3.01731476  | -0.27921867 |
| Ne | 2.61307124  | -1.50865738 | -0.27921867 |
| Ne | -2.61307124 | -1.50865738 | -0.27921867 |

NH<sub>4</sub><sup>+</sup>...Ne<sub>4</sub> I

|    |             |             |             |
|----|-------------|-------------|-------------|
| N  | 0.00000000  | 0.00000000  | 0.00000000  |
| H  | -0.00000000 | -0.00000000 | 1.02684459  |
| H  | -0.00000000 | -0.96811836 | -0.34228153 |
| H  | -0.83841510 | 0.48405918  | -0.34228153 |
| H  | 0.83841510  | 0.48405918  | -0.34228153 |
| Ne | -0.00000000 | -0.00000000 | 3.19269099  |
| Ne | -0.00000000 | -3.01009793 | -1.06423033 |
| Ne | -2.60682127 | 1.50504896  | -1.06423033 |
| Ne | 2.60682127  | 1.50504896  | -1.06423033 |

NH<sub>4</sub><sup>+</sup>...Ne<sub>4</sub> II

|    |             |             |             |
|----|-------------|-------------|-------------|
| N  | 0.00000000  | 0.00000000  | -1.24632114 |
| H  | 0.00000000  | 0.96773899  | -0.90283913 |
| H  | 0.83808655  | -0.48386949 | -0.90283913 |
| H  | -0.83808655 | -0.48386949 | -0.90283913 |
| H  | -0.00000000 | -0.00000000 | -2.27263914 |
| Ne | 0.00000000  | 2.98219998  | -0.12271811 |
| Ne | 2.58266094  | -1.49109999 | -0.12271811 |
| Ne | -2.58266094 | -1.49109999 | -0.12271811 |
| Ne | 0.00000000  | 0.00000000  | 1.73869486  |

NH<sub>4</sub><sup>+</sup>...Ne<sub>5</sub>

|   |             |             |            |
|---|-------------|-------------|------------|
| N | -0.00000000 | -0.00000000 | 0.51909187 |
| H | -0.00000000 | -0.00000000 | 1.54563687 |
| H | 0.00000000  | 0.96711902  | 0.17471887 |

|    |             |             |             |
|----|-------------|-------------|-------------|
| H  | -0.83754964 | -0.48355951 | 0.17471887  |
| H  | 0.83754964  | -0.48355951 | 0.17471887  |
| Ne | -0.00000000 | -0.00000000 | 3.71089487  |
| Ne | 0.00000000  | 2.98242802  | -0.60489014 |
| Ne | -2.58285843 | -1.49121401 | -0.60489014 |
| Ne | 2.58285843  | -1.49121401 | -0.60489014 |
| Ne | -0.00000000 | -0.00000000 | -2.46656813 |

NH<sub>4</sub><sup>+</sup>...Ar

|    |             |             |             |
|----|-------------|-------------|-------------|
| N  | 0.00000000  | 0.00000000  | -2.13208379 |
| H  | 0.00000000  | 0.00000000  | -1.10185579 |
| H  | 0.00000000  | 0.96770600  | -2.47556579 |
| H  | 0.83805798  | -0.48385300 | -2.47556579 |
| H  | -0.83805798 | -0.48385300 | -2.47556579 |
| Ar | 0.00000000  | 0.00000000  | 1.30295221  |

NH<sub>4</sub><sup>+</sup>...Ar<sub>2</sub>

|    |             |             |             |
|----|-------------|-------------|-------------|
| N  | 0.00000000  | 0.00000000  | 1.52846289  |
| H  | 0.00000000  | 0.84124800  | 0.93506389  |
| H  | 0.00000000  | -0.84124800 | 0.93506389  |
| H  | 0.83733600  | -0.00000000 | 2.12201989  |
| H  | -0.83733600 | -0.00000000 | 2.12201989  |
| Ar | 0.00000000  | 2.80667700  | -0.46703911 |
| Ar | 0.00000000  | -2.80667700 | -0.46703911 |

NH<sub>4</sub><sup>+</sup>...Ar<sub>3</sub>

|    |             |             |             |
|----|-------------|-------------|-------------|
| N  | -0.00000000 | -0.00000000 | 0.96126285  |
| H  | 0.00000000  | 0.97028428  | 0.61938583  |
| H  | -0.84029084 | -0.48514214 | 0.61938583  |
| H  | 0.84029084  | -0.48514214 | 0.61938583  |
| H  | 0.00000000  | -0.00000000 | 1.98718285  |
| Ar | 0.00000000  | 3.25066727  | -0.19581820 |
| Ar | -2.81516044 | -1.62533364 | -0.19581820 |
| Ar | 2.81516044  | -1.62533364 | -0.19581820 |

NH<sub>4</sub><sup>+</sup>...Ar<sub>4</sub> I

|   |             |             |             |
|---|-------------|-------------|-------------|
| N | 0.00000000  | 0.00000000  | 0.00000000  |
| H | -0.00000000 | -0.00000000 | 1.02834455  |
| H | -0.00000000 | -0.96953254 | -0.34278152 |
| H | -0.83963981 | 0.48476627  | -0.34278152 |

|    |             |             |             |
|----|-------------|-------------|-------------|
| H  | 0.83963981  | 0.48476627  | -0.34278152 |
| Ar | -0.00000000 | -0.00000000 | 3.45597656  |
| Ar | -0.00000000 | -3.25832595 | -1.15199219 |
| Ar | -2.82179305 | 1.62916298  | -1.15199219 |
| Ar | 2.82179305  | 1.62916298  | -1.15199219 |

NH<sub>4</sub><sup>+</sup>...Ar<sub>4</sub> II

|    |             |             |             |
|----|-------------|-------------|-------------|
| N  | -0.00000000 | 0.00000000  | -1.38270455 |
| H  | 0.00000000  | 0.96866218  | -1.03732758 |
| H  | 0.83888606  | -0.48433109 | -1.03732758 |
| H  | -0.83888606 | -0.48433109 | -1.03732758 |
| H  | -0.00000000 | 0.00000000  | -2.40836655 |
| Ar | 0.00000000  | 3.29153921  | -0.35082165 |
| Ar | 2.85055657  | -1.64576960 | -0.35082165 |
| Ar | -2.85055657 | -1.64576960 | -0.35082165 |
| Ar | 0.00000000  | 0.00000000  | 1.89686945  |

NH<sub>4</sub><sup>+</sup>...Ar<sub>5</sub>

|    |             |             |             |
|----|-------------|-------------|-------------|
| N  | -0.00000000 | -0.00000000 | 0.51930932  |
| H  | 0.00000000  | -0.00000000 | 1.54702632  |
| H  | 0.00000000  | 0.96768516  | 0.17304538  |
| H  | -0.83803993 | -0.48384258 | 0.17304538  |
| H  | 0.83803993  | -0.48384258 | 0.17304538  |
| Ar | 0.00000000  | 0.00000000  | 3.98006432  |
| Ar | 0.00000000  | 3.29562520  | -0.51053747 |
| Ar | -2.85409515 | -1.64781260 | -0.51053747 |
| Ar | 2.85409515  | -1.64781260 | -0.51053747 |
| Ar | -0.00000000 | -0.00000000 | -2.76519168 |

NH<sub>4</sub><sup>+</sup>...Kr

|    |             |             |             |
|----|-------------|-------------|-------------|
| N  | 0.00000000  | 0.00000000  | -2.69463000 |
| H  | 0.00000000  | 0.00000000  | -1.66271100 |
| H  | 0.00000000  | 0.96757600  | -3.03806100 |
| H  | -0.83794540 | -0.48378800 | -3.03806100 |
| H  | 0.83794540  | -0.48378800 | -3.03806100 |
| Kr | 0.00000000  | 0.00000000  | 0.82331400  |

NH<sub>4</sub><sup>+</sup>...Kr<sub>2</sub>

|   |            |            |            |
|---|------------|------------|------------|
| N | 0.00000000 | 0.00000000 | 1.78784537 |
| H | 0.00000000 | 0.84216000 | 1.19327137 |

|    |             |             |             |
|----|-------------|-------------|-------------|
| H  | 0.00000000  | -0.84216000 | 1.19327137  |
| H  | 0.83724800  | -0.00000000 | 2.38107237  |
| H  | -0.83724800 | -0.00000000 | 2.38107237  |
| Kr | 0.00000000  | 2.86716000  | -0.27310563 |
| Kr | 0.00000000  | -2.86716000 | -0.27310563 |

NH<sub>4</sub><sup>+</sup>...Kr<sub>3</sub>

|    |             |             |             |
|----|-------------|-------------|-------------|
| N  | 0.00000000  | 0.00000000  | 1.09272549  |
| H  | 0.00000000  | 0.97174499  | 0.74988949  |
| H  | -0.84155585 | -0.48587250 | 0.74988949  |
| H  | 0.84155585  | -0.48587250 | 0.74988949  |
| H  | 0.00000000  | 0.00000000  | 2.11825249  |
| Kr | 0.00000000  | 3.32831599  | -0.11126852 |
| Kr | -2.88240620 | -1.66415800 | -0.11126852 |
| Kr | 2.88240620  | -1.66415800 | -0.11126852 |

NH<sub>4</sub><sup>+</sup>...Kr<sub>4</sub> I

|    |             |             |             |
|----|-------------|-------------|-------------|
| N  | 0.00000000  | 0.00000000  | 0.00000000  |
| H  | -0.00000000 | -0.00000000 | 1.02908760  |
| H  | -0.00000000 | -0.97023309 | -0.34302920 |
| H  | -0.84024650 | 0.48511654  | -0.34302920 |
| H  | 0.84024650  | 0.48511654  | -0.34302920 |
| Kr | -0.00000000 | -0.00000000 | 3.54610036  |
| Kr | -0.00000000 | -3.34329549 | -1.18203345 |
| Kr | -2.89537882 | 1.67164774  | -1.18203345 |
| Kr | 2.89537882  | 1.67164774  | -1.18203345 |

NH<sub>4</sub><sup>+</sup>...Kr<sub>4</sub> II

|    |             |             |             |
|----|-------------|-------------|-------------|
| N  | 0.00000000  | 0.00000000  | -1.45443621 |
| H  | 0.00000000  | 0.96955900  | -1.10849520 |
| H  | 0.83966272  | -0.48477950 | -1.10849520 |
| H  | -0.83966272 | -0.48477950 | -1.10849520 |
| H  | -0.00000000 | 0.00000000  | -2.47984421 |
| Kr | 0.00000000  | 3.40721999  | -0.49624220 |
| Kr | 2.95073907  | -1.70361000 | -0.49624220 |
| Kr | -2.95073907 | -1.70361000 | -0.49624220 |
| Kr | -0.00000000 | 0.00000000  | 1.93279279  |

NH<sub>4</sub><sup>+</sup>...Kr<sub>5</sub>

|   |             |             |            |
|---|-------------|-------------|------------|
| N | -0.00000000 | -0.00000000 | 0.50322406 |
|---|-------------|-------------|------------|

|    |             |             |             |
|----|-------------|-------------|-------------|
| H  | -0.00000000 | -0.00000000 | 1.53182706  |
| H  | 0.00000000  | 0.96835719  | 0.15653811  |
| H  | -0.83862192 | -0.48417859 | 0.15653811  |
| H  | 0.83862192  | -0.48417859 | 0.15653811  |
| Kr | 0.00000000  | 0.00000000  | 4.05491106  |
| Kr | 0.00000000  | 3.41542322  | -0.44127275 |
| Kr | -2.95784327 | -1.70771161 | -0.44127275 |
| Kr | 2.95784327  | -1.70771161 | -0.44127275 |
| Kr | 0.00000000  | -0.00000000 | -2.88453694 |

NH<sub>4</sub><sup>+</sup>...H<sub>2</sub>O

|   |             |             |             |
|---|-------------|-------------|-------------|
| N | 0.00001125  | -1.34562722 | 0.00000000  |
| H | -0.00291663 | -0.28771642 | 0.00000000  |
| H | -0.48126923 | -1.69952281 | 0.83256600  |
| H | -0.48126923 | -1.69952281 | -0.83256600 |
| H | 0.96400260  | -1.69306699 | 0.00000000  |
| O | 0.00152189  | 1.36252936  | 0.00000000  |
| H | -0.00540070 | 1.94949232  | -0.76968500 |
| H | -0.00540070 | 1.94949232  | 0.76968500  |

NH<sub>4</sub><sup>+</sup>...(H<sub>2</sub>O)<sub>2</sub>

|   |             |             |             |
|---|-------------|-------------|-------------|
| N | -0.00881807 | 1.06215806  | 0.00000000  |
| H | 0.85639895  | 0.47373110  | 0.00000000  |
| H | -0.01253205 | 1.66035810  | -0.82974909 |
| H | -0.86479005 | 0.45966203  | 0.00000000  |
| H | -0.01253205 | 1.66035810  | 0.82974909  |
| O | 2.26732499  | -0.51414085 | 0.00000000  |
| H | 2.78865896  | -0.79026787 | 0.76684094  |
| H | 2.78865896  | -0.79026787 | -0.76684094 |
| O | -2.26617001 | -0.52995902 | 0.00000000  |
| H | -2.29383398 | -1.49696402 | 0.00000000  |
| H | -3.19294502 | -0.25226905 | 0.00000000  |

NH<sub>4</sub><sup>+</sup>...(H<sub>2</sub>O)<sub>3</sub> I

|   |             |             |             |
|---|-------------|-------------|-------------|
| N | -0.00000000 | -0.00000000 | 0.70329510  |
| H | 0.97320689  | -0.14042202 | 0.36586914  |
| H | -0.36499441 | 0.91303290  | 0.36586914  |
| H | -0.60821248 | -0.77261088 | 0.36586914  |
| H | -0.00000000 | -0.00000000 | 1.72476310  |
| O | 2.62862373  | -0.38867328 | -0.22500877 |

|   |             |             |             |
|---|-------------|-------------|-------------|
| H | 3.30392759  | -0.98682625 | 0.12371327  |
| H | 3.08297980  | 0.12596289  | -0.90625977 |
| O | -0.97771093 | 2.47079157  | -0.22500877 |
| H | -0.79734719 | 3.35469835  | 0.12371327  |
| H | -1.65057696 | 2.60695738  | -0.90625977 |
| O | -1.65091280 | -2.08211829 | -0.22500877 |
| H | -1.43240284 | -2.73292027 | -0.90625977 |
| H | -2.50658040 | -2.36787209 | 0.12371327  |

NH<sub>4</sub><sup>+</sup>...(H<sub>2</sub>O)<sub>3</sub> II

|   |             |             |             |
|---|-------------|-------------|-------------|
| N | 0.00000000  | 0.00000000  | -2.10272380 |
| H | 0.00000000  | 0.83613600  | -1.47071780 |
| H | 0.00000000  | -0.83613600 | -1.47071780 |
| H | -0.83296600 | 0.00000000  | -2.69448180 |
| H | 0.83296600  | 0.00000000  | -2.69448180 |
| O | 0.00000000  | 1.81150500  | -0.08190580 |
| H | 0.00000000  | 2.76595500  | 0.06534420  |
| H | 0.00000000  | 1.39014500  | 0.79745720  |
| O | 0.00000000  | -1.81150500 | -0.08190580 |
| H | 0.00000000  | -1.39014500 | 0.79745720  |
| H | 0.00000000  | -2.76595500 | 0.06534420  |
| O | 0.00000000  | 0.00000000  | 2.14424820  |
| H | -0.76444200 | 0.00000000  | 2.74018520  |
| H | 0.76444200  | 0.00000000  | 2.74018520  |

NH<sub>4</sub><sup>+</sup>...(H<sub>2</sub>O)<sub>3</sub> III

|   |             |             |             |
|---|-------------|-------------|-------------|
| N | 1.45622612  | -1.27849002 | 0.00000000  |
| H | 0.39803512  | -1.30433106 | 0.00000000  |
| H | 1.79556908  | -0.29219001 | 0.00000000  |
| H | 1.81015715  | -1.75769199 | 0.83049299  |
| H | 1.81015715  | -1.75769199 | -0.83049299 |
| O | -1.22919488 | -1.27660312 | 0.00000000  |
| H | -1.84768486 | -2.01796514 | 0.00000000  |
| H | -1.77232591 | -0.45616814 | 0.00000000  |
| O | 2.32155303  | 1.36913401  | 0.00000000  |
| H | 1.75106900  | 2.15009699  | 0.00000000  |
| H | 3.22375001  | 1.71785904  | 0.00000000  |
| O | -2.50944497 | 1.13039584  | 0.00000000  |
| H | -3.01279296 | 1.44206484  | 0.76512800  |

|                                                                    |             |             |             |
|--------------------------------------------------------------------|-------------|-------------|-------------|
| H                                                                  | -3.01279296 | 1.44206484  | -0.76512800 |
| NH <sub>4</sub> <sup>+</sup> ...(H <sub>2</sub> O) <sub>4</sub> I  |             |             |             |
| N                                                                  | 0.00000000  | 0.00000000  | 0.00000000  |
| H                                                                  | 0.00415700  | 0.84415400  | 0.59769700  |
| H                                                                  | 0.84415400  | -0.00415700 | -0.59769700 |
| H                                                                  | -0.00415700 | -0.84415400 | 0.59769700  |
| H                                                                  | -0.84415400 | 0.00415700  | -0.59769700 |
| O                                                                  | -0.00000000 | 2.33813000  | 1.64487200  |
| H                                                                  | -0.52474200 | 2.50808100  | 2.43896800  |
| H                                                                  | 0.57913900  | 3.10835600  | 1.56564600  |
| O                                                                  | 2.33813000  | 0.00000000  | -1.64487200 |
| H                                                                  | 2.50808100  | 0.52474200  | -2.43896800 |
| H                                                                  | 3.10835600  | -0.57913900 | -1.56564600 |
| O                                                                  | 0.00000000  | -2.33813000 | 1.64487200  |
| H                                                                  | 0.52474200  | -2.50808100 | 2.43896800  |
| H                                                                  | -0.57913900 | -3.10835600 | 1.56564600  |
| O                                                                  | -2.33813000 | -0.00000000 | -1.64487200 |
| H                                                                  | -3.10835600 | 0.57913900  | -1.56564600 |
| H                                                                  | -2.50808100 | -0.52474200 | -2.43896800 |
| NH <sub>4</sub> <sup>+</sup> ...(H <sub>2</sub> O) <sub>4</sub> II |             |             |             |
| N                                                                  | -0.85368588 | 1.13979800  | 0.00000000  |
| H                                                                  | -0.64075197 | 0.54950101  | -0.82923002 |
| H                                                                  | -0.64075197 | 0.54950101  | 0.82923002  |
| H                                                                  | -0.28514489 | 2.00689200  | 0.00000000  |
| H                                                                  | -1.84446989 | 1.38549200  | 0.00000000  |
| O                                                                  | -0.18869207 | -0.82399297 | -1.82528609 |
| H                                                                  | -0.15999117 | -0.99465996 | -2.77511810 |
| H                                                                  | 0.08977998  | -1.64987498 | -1.38961213 |
| O                                                                  | -0.18869207 | -0.82399297 | 1.82528609  |
| H                                                                  | 0.08977998  | -1.64987498 | 1.38961213  |
| H                                                                  | -0.15999117 | -0.99465996 | 2.77511810  |
| O                                                                  | 0.52975912  | -2.93795700 | 0.00000000  |
| H                                                                  | 1.44558713  | -3.25437400 | 0.00000000  |
| H                                                                  | -0.00133887 | -3.74841100 | 0.00000000  |
| O                                                                  | 0.62105911  | 3.55300300  | 0.00000000  |
| H                                                                  | 0.94124619  | 4.04926499  | 0.76530386  |
| H                                                                  | 0.94124619  | 4.04926499  | -0.76530386 |



NH<sub>4</sub><sup>+</sup>...(H<sub>2</sub>O)<sub>4</sub> III

|   |             |             |             |
|---|-------------|-------------|-------------|
| N | -1.00876714 | -0.00108405 | 0.76519995  |
| H | -0.14719606 | -0.56490093 | 0.56790495  |
| H | -0.88040726 | 0.97371098  | 0.43495201  |
| H | -1.83035607 | -0.42689014 | 0.29770191  |
| H | -1.16936517 | 0.01348888  | 1.77344595  |
| O | 1.26891606  | -1.42624073 | 0.25608394  |
| H | 1.42481519  | -2.37588571 | 0.33068190  |
| H | 2.13692002  | -1.02390860 | 0.03510499  |
| O | -0.63257247 | 2.66967304  | -0.09295290 |
| H | -1.30357255 | 3.32574296  | -0.32594189 |
| H | 0.21180948  | 3.12097016  | -0.22781486 |
| O | 3.59043590  | -0.09168039 | -0.36142493 |
| H | 4.00554494  | -0.15673029 | -1.23255492 |
| H | 4.33129388  | -0.02265532 | 0.25650409  |
| O | -3.26295295 | -1.15269429 | -0.51454916 |
| H | -4.13884794 | -1.33990342 | -0.15012720 |
| H | -3.28988088 | -1.50791125 | -1.41351218 |

NH<sub>4</sub><sup>+</sup>...(H<sub>2</sub>O)<sub>4</sub> IV

|   |             |             |             |
|---|-------------|-------------|-------------|
| N | -0.54677310 | 2.79444090  | 0.00000000  |
| H | -0.32175999 | 2.20097793  | 0.83665205  |
| H | -0.32175999 | 2.20097793  | -0.83665205 |
| H | -1.53530111 | 3.05154889  | 0.00000000  |
| H | 0.02194389  | 3.64287390  | 0.00000000  |
| O | 0.15694515  | 0.90059398  | 1.78597304  |
| H | 0.25570228  | 0.74292102  | 2.73292403  |
| H | 0.45641310  | 0.08961896  | 1.32412703  |
| O | 0.15694515  | 0.90059398  | -1.78597304 |
| H | 0.45641310  | 0.08961896  | -1.32412703 |
| H | 0.25570228  | 0.74292102  | -2.73292403 |
| O | 0.89153693  | -1.11211309 | 0.00000000  |
| H | 0.35734094  | -1.94079609 | 0.00000000  |
| H | 1.81177993  | -1.41117708 | 0.00000000  |
| O | -0.68740205 | -3.33676810 | 0.00000000  |
| H | -0.87632815 | -3.89479514 | -0.76637162 |
| H | -0.87632815 | -3.89479514 | 0.76637162  |

NH<sub>4</sub><sup>+</sup>...NH<sub>3</sub>

|   |             |             |             |
|---|-------------|-------------|-------------|
| N | -0.00000000 | -0.00000000 | -1.35274600 |
| H | -0.00000000 | -0.00000000 | -0.23770700 |
| H | -0.88611215 | -0.36495796 | -1.71419500 |
| H | 0.12699321  | 0.94987462  | -1.71419500 |
| H | 0.75911894  | -0.58491665 | -1.71419500 |
| N | -0.00000000 | -0.00000000 | 1.36361100  |
| H | -0.74695755 | -0.57078192 | 1.76807900  |
| H | -0.12083286 | 0.93227517  | 1.76807900  |
| H | 0.86779041  | -0.36149326 | 1.76807900  |

NH<sub>4</sub><sup>+</sup>...(NH<sub>3</sub>)<sub>2</sub>

|   |             |             |             |
|---|-------------|-------------|-------------|
| N | -0.00045695 | 1.04979594  | 0.00000819  |
| H | 0.88559606  | 0.44992694  | -0.00049480 |
| H | -0.88654891 | 0.44974794  | 0.00049370  |
| H | -0.00088732 | 1.65264254  | -0.82608083 |
| H | 0.00028235  | 1.65262935  | 0.82610315  |
| N | 2.35755712  | -0.51169395 | -0.00002548 |
| H | 3.18277880  | 0.02002023  | 0.28630267  |
| H | 2.59156567  | -0.89816166 | -0.91725368 |
| H | 2.32272994  | -1.31515533 | 0.63124768  |
| N | -2.35712388 | -0.51181718 | 0.00003789  |
| H | -2.21364856 | -1.48234443 | -0.28751888 |
| H | -3.07551964 | -0.14771273 | -0.63002953 |
| H | -2.80618241 | -0.56558650 | 0.91708631  |

NH<sub>4</sub><sup>+</sup>...(NH<sub>3</sub>)<sub>3</sub> I

|   |             |             |             |
|---|-------------|-------------|-------------|
| N | -0.00000000 | 0.00000000  | 0.67906424  |
| H | -0.30505556 | 0.95137991  | 0.34477725  |
| H | -0.67139139 | -0.73987582 | 0.34477725  |
| H | 0.97644695  | -0.21150409 | 0.34477725  |
| H | -0.00000000 | 0.00000000  | 1.70057424  |
| N | -0.84227002 | 2.63030009  | -0.21336074 |
| H | -0.08187044 | 3.31295379  | -0.23278174 |
| H | -1.55967841 | 3.04426594  | 0.38555426  |
| H | -1.23841567 | 2.64077271  | -1.15536574 |
| N | 2.69904171  | -0.58572281 | -0.21336074 |
| H | 2.91003736  | -1.58557501 | -0.23278174 |
| H | 3.41625085  | -0.17141185 | 0.38555426  |
| H | 2.90618409  | -0.24788692 | -1.15536574 |

|   |             |             |             |
|---|-------------|-------------|-------------|
| N | -1.85677169 | -2.04457728 | -0.21336074 |
| H | -1.66776842 | -2.39288579 | -1.15536574 |
| H | -2.82816692 | -1.72737878 | -0.23278174 |
| H | -1.85657244 | -2.87285409 | 0.38555426  |

NH<sub>4</sub><sup>+</sup>...(NH<sub>3</sub>)<sub>3</sub> II

|   |             |             |             |
|---|-------------|-------------|-------------|
| N | -2.19738579 | -0.09911469 | 0.00000000  |
| H | -1.60111424 | 0.78897979  | 0.00000000  |
| H | -1.49456940 | -0.91439674 | 0.00000000  |
| H | -2.79371767 | -0.13362811 | 0.82879000  |
| H | -2.79371767 | -0.13362811 | -0.82879000 |
| N | -0.31127017 | 1.96264048  | 0.00000000  |
| H | 0.56427111  | 1.42885297  | 0.00000000  |
| H | -0.27492198 | 2.57933337  | 0.81358000  |
| H | -0.27492198 | 2.57933337  | -0.81358000 |
| N | -0.11618464 | -1.93329334 | 0.00000000  |
| H | -0.02833110 | -2.54490851 | -0.81349900 |
| H | -0.02833110 | -2.54490851 | 0.81349900  |
| H | 0.71263591  | -1.32554617 | 0.00000000  |
| N | 2.51455375  | 0.05507576  | 0.00000000  |
| H | 2.86516591  | 0.56869675  | 0.81198800  |
| H | 2.86516591  | 0.56869675  | -0.81198800 |
| H | 3.05439424  | -0.81403441 | 0.00000000  |

NH<sub>4</sub><sup>+</sup>...(NH<sub>3</sub>)<sub>3</sub> III

|   |             |             |             |
|---|-------------|-------------|-------------|
| N | 1.04110303  | 0.92900104  | 0.00277099  |
| H | 0.25613703  | 0.16318405  | 0.00275598  |
| H | 0.93706706  | 1.52466203  | -0.82138902 |
| H | 0.93948902  | 1.52217405  | 0.82902498  |
| H | 2.01191103  | 0.49892903  | 0.00069902  |
| N | -0.94080999 | -0.96898094 | 0.00263997  |
| H | -0.90696897 | -1.58996996 | -0.80849202 |
| H | -1.88708398 | -0.54747793 | 0.00069393  |
| H | -0.90932301 | -1.58768393 | 0.81561298  |
| N | -3.77092197 | 0.26093809  | -0.00257713 |
| H | -4.01778994 | 0.83281407  | -0.81212215 |
| H | -4.02332699 | 0.82193410  | 0.81285785  |
| H | -4.43569898 | -0.51498191 | -0.01003414 |
| N | 3.66132102  | -0.21861399 | -0.00272092 |

|   |            |             |             |
|---|------------|-------------|-------------|
| H | 4.20945205 | 0.02870399  | -0.82942391 |
| H | 3.65992401 | -1.24039499 | 0.02435910  |
| H | 4.23136700 | 0.07169802  | 0.79466709  |

NH<sub>4</sub><sup>+</sup>...(NH<sub>3</sub>)<sub>4</sub> I

|   |             |             |             |
|---|-------------|-------------|-------------|
| N | 0.00000000  | 0.00000000  | 0.00000000  |
| H | 0.00000000  | 0.00000000  | 1.04400402  |
| H | -0.00000000 | -0.98429643 | -0.34800134 |
| H | -0.85242571 | 0.49214821  | -0.34800134 |
| H | 0.85242571  | 0.49214821  | -0.34800134 |
| N | 0.00000000  | -0.00000000 | 2.96480160  |
| H | -0.92249221 | -0.17033956 | 3.36967771  |
| H | 0.31372772  | 0.88407147  | 3.36967771  |
| H | 0.60876449  | -0.71373191 | 3.36967771  |
| N | -0.00000000 | -2.79524175 | -0.98826720 |
| H | -0.31372772 | -2.88227212 | -1.95673648 |
| H | -0.60876449 | -3.41487325 | -0.45031300 |
| H | 0.92249221  | -3.23374247 | -0.96262823 |
| N | -2.42075037 | 1.39762088  | -0.98826720 |
| H | -3.26174923 | 0.81796954  | -0.96262823 |
| H | -2.33925702 | 1.71283224  | -1.95673648 |
| H | -2.65298474 | 2.23464214  | -0.45031300 |
| N | 2.42075037  | 1.39762088  | -0.98826720 |
| H | 2.33925702  | 2.41577292  | -0.96262823 |
| H | 2.65298474  | 1.16943988  | -1.95673648 |
| H | 3.26174923  | 1.18023111  | -0.45031300 |

NH<sub>4</sub><sup>+</sup>...(NH<sub>3</sub>)<sub>4</sub> II

|   |             |             |             |
|---|-------------|-------------|-------------|
| N | 1.22734223  | 0.01003530  | 0.86044286  |
| H | 0.63432519  | 0.85385925  | 0.64242277  |
| H | 0.61221724  | -0.82354675 | 0.64869503  |
| H | 2.11114120  | -0.00230176 | 0.29269581  |
| H | 1.47028529  | 0.01181246  | 1.85193585  |
| N | -0.72982786 | 1.98616515  | 0.18535968  |
| H | -1.52806286 | 1.38274809  | -0.03733718 |
| H | -0.57269793 | 2.57159602  | -0.63640542 |
| H | -1.04512183 | 2.62274825  | 0.91904060  |
| N | -0.74383476 | -1.94019785 | 0.21095929  |
| H | -1.05185969 | -2.56755874 | 0.95565940  |

|   |             |             |             |
|---|-------------|-------------|-------------|
| H | -0.58031879 | -2.53864497 | -0.60017263 |
| H | -1.55078279 | -1.34989691 | -0.02260975 |
| N | -3.36997186 | -0.03695003 | -0.52053384 |
| H | -3.52537892 | 0.47100283  | -1.39426091 |
| H | -3.93986282 | 0.44851006  | 0.17597512  |
| H | -3.84449784 | -0.93240707 | -0.65887567 |
| N | 3.70795613  | -0.02646087 | -0.66705929 |
| H | 3.80436112  | -0.84170496 | -1.27552417 |
| H | 4.53563117  | -0.03814875 | -0.06763734 |
| H | 3.82897507  | 0.78379104  | -1.27778242 |

NH<sub>4</sub><sup>+</sup>...(NH<sub>3</sub>)<sub>4</sub> III

|   |             |             |             |
|---|-------------|-------------|-------------|
| N | 1.19086500  | 0.01261112  | 0.85129484  |
| H | 0.15608105  | -0.17448310 | 1.03776588  |
| H | 1.68504505  | 0.02159814  | 1.74502482  |
| H | 1.60112312  | -0.74751774 | 0.25511675  |
| H | 1.32041079  | 0.94775819  | 0.39289792  |
| N | -1.54006587 | -0.49016647 | 1.38241694  |
| H | -1.70767366 | -1.45179054 | 1.68477686  |
| H | -2.16876594 | -0.33346653 | 0.57862999  |
| H | -1.90428394 | 0.09180938  | 2.13933701  |
| N | -3.53420908 | -0.04323965 | -0.99731692 |
| H | -3.20872814 | -0.00475150 | -1.96434193 |
| H | -4.08425425 | 0.80681023  | -0.86197581 |
| H | -4.21178093 | -0.80736779 | -0.97077195 |
| N | 2.34753934  | -2.12853050 | -0.77126742 |
| H | 3.10021925  | -1.82147129 | -1.39040443 |
| H | 1.66749440  | -2.58938958 | -1.37886143 |
| H | 2.75316052  | -2.87573147 | -0.20415651 |
| N | 1.56072841  | 2.63839331  | -0.38241594 |
| H | 2.38855933  | 3.13047744  | -0.04045093 |
| H | 0.77780130  | 3.26998313  | -0.20269884 |
| H | 1.66158737  | 2.61405842  | -1.39886794 |

**Table S2.** NH bond lengths of the central ammonium ion and NH...Rg bond distances in ammonium–rare gas clusters,  $\text{NH}_4^+ \dots \text{Rg}_n$ , optimized at the MP2/aug-cc-pVDZ level.

| Cluster                              | Free NH bond length (Å) | Bonded NH bond length (Å) | NH...Rg distance (Å) |
|--------------------------------------|-------------------------|---------------------------|----------------------|
| $\text{NH}_4^+$                      | 1.027                   | –                         | –                    |
| $\text{NH}_4^+ \dots \text{Ne}$      | 1.027                   | 1.028                     | 2.161                |
| $\text{NH}_4^+ \dots \text{Ne}_2$    | 1.027                   | 1.027                     | 2.163                |
| $\text{NH}_4^+ \dots \text{Ne}_3$    | 1.027                   | 1.027                     | 2.165                |
| $\text{NH}_4^+ \dots \text{Ne}_4$ I  | –                       | 1.027                     | 2.166                |
| $\text{NH}_4^+ \dots \text{Ne}_4$ II | 1.026                   | 1.027                     | 2.160                |
| $\text{NH}_4^+ \dots \text{Ne}_5$    | –                       | 1.027                     | 2.165                |
|                                      |                         | 1.027                     | 2.161                |
| $\text{NH}_4^+ \dots \text{Ar}$      | 1.027                   | 1.030                     | 2.405                |
| $\text{NH}_4^+ \dots \text{Ar}_2$    | 1.026                   | 1.029                     | 2.414                |
| $\text{NH}_4^+ \dots \text{Ar}_3$    | 1.026                   | 1.029                     | 2.422                |
| $\text{NH}_4^+ \dots \text{Ar}_4$ I  | –                       | 1.028                     | 2.428                |
| $\text{NH}_4^+ \dots \text{Ar}_4$ II | 1.026                   | 1.028                     | 2.422                |
| $\text{NH}_4^+ \dots \text{Ar}_5$    | –                       | 1.028                     | 2.433                |
|                                      |                         | 1.028                     | 2.426                |
| $\text{NH}_4^+ \dots \text{Kr}$      | 1.027                   | 1.032                     | 2.486                |
| $\text{NH}_4^+ \dots \text{Kr}_2$    | 1.026                   | 1.031                     | 2.500                |
| $\text{NH}_4^+ \dots \text{Kr}_3$    | 1.026                   | 1.030                     | 2.509                |
| $\text{NH}_4^+ \dots \text{Kr}_4$ I  | –                       | 1.029                     | 2.517                |
| $\text{NH}_4^+ \dots \text{Kr}_4$ II | 1.025                   | 1.029                     | 2.513                |
| $\text{NH}_4^+ \dots \text{Kr}_5$    | –                       | 1.029                     | 2.523                |
|                                      |                         | 1.029                     | 2.519                |

**Table S3.** NH bond lengths of the central ammonium ion and NH...X hydrogen bond distances in  $\text{NH}_4^+ \dots (\text{H}_2\text{O})_n$  and  $\text{NH}_4^+ \dots (\text{NH}_3)_n$  clusters optimized at the MP2/aug-cc-pVDZ level.

| Cluster                                          | Free NH bond length (Å) | H-bonded NH bond length (Å) | NH...X distance (Å) |
|--------------------------------------------------|-------------------------|-----------------------------|---------------------|
| $\text{NH}_4^+ \dots \text{H}_2\text{O}$         | 1.025                   | 1.058                       | 1.650               |
| $\text{NH}_4^+ \dots (\text{H}_2\text{O})_2$     | 1.023                   | 1.046                       | 1.716               |
| $\text{NH}_4^+ \dots (\text{H}_2\text{O})_3$ I   | 1.021                   | 1.039                       | 1.775               |
| $\text{NH}_4^+ \dots (\text{H}_2\text{O})_3$ II  | 1.022                   | 1.048                       | 1.697               |
| $\text{NH}_4^+ \dots (\text{H}_2\text{O})_3$ III | 1.022                   | 1.059                       | 1.627               |
|                                                  |                         | 1.043                       | 1.743               |
| $\text{NH}_4^+ \dots (\text{H}_2\text{O})_4$ I   | –                       | 1.034                       | 1.824               |
| $\text{NH}_4^+ \dots (\text{H}_2\text{O})_4$ II  | 1.021                   | 1.041                       | 1.756               |
|                                                  |                         | 1.037                       | 1.792               |
| $\text{NH}_4^+ \dots (\text{H}_2\text{O})_4$ III | 1.021                   | 1.048                       | 1.687               |
|                                                  |                         | 1.037                       | 1.793               |
|                                                  |                         | 1.037                       | 1.800               |
| $\text{NH}_4^+ \dots (\text{H}_2\text{O})_4$ IV  | 1.021                   | 1.050                       | 1.680               |
| $\text{NH}_4^+ \dots \text{NH}_3$                | 1.024                   | 1.115                       | 1.601               |
| $\text{NH}_4^+ \dots (\text{NH}_3)_2$            | 1.023                   | 1.070                       | 1.758               |
| $\text{NH}_4^+ \dots (\text{NH}_3)_3$ I          | 1.022                   | 1.054                       | 1.849               |
| $\text{NH}_4^+ \dots (\text{NH}_3)_3$ II         | 1.022                   | 1.076                       | 1.714               |
|                                                  |                         | 1.070                       | 1.744               |
| $\text{NH}_4^+ \dots (\text{NH}_3)_3$ III        | 1.022                   | 1.097                       | 1.648               |
|                                                  |                         | 1.062                       | 1.799               |
| $\text{NH}_4^+ \dots (\text{NH}_3)_4$ I          | –                       | 1.044                       | 1.921               |
| $\text{NH}_4^+ \dots (\text{NH}_3)_4$ II         | 1.021                   | 1.057                       | 1.810               |
|                                                  |                         | 1.054                       | 1.831               |
|                                                  |                         | 1.050                       | 1.863               |
| $\text{NH}_4^+ \dots (\text{NH}_3)_4$ III        | 1.021                   | 1.068                       | 1.759               |
|                                                  |                         | 1.050                       | 1.876               |
|                                                  |                         | 1.049                       | 1.875               |

**Table S4.** Hamiltonian matrix elements (in  $\text{cm}^{-1}$ ) of NH bending overtones and stretching fundamentals involved in Fermi resonance and the original IR intensities of corresponding vibrational quantum states (in  $\text{km/mol}$ ) in the bare  $\text{NH}_4^+$  ion.<sup>a</sup>

|                     |               | Bending overtones |               |               |               |               |               |               |               |               |               |               | Stretching fundamentals |               |               |                  | Original          |                    |                     |         |
|---------------------|---------------|-------------------|---------------|---------------|---------------|---------------|---------------|---------------|---------------|---------------|---------------|---------------|-------------------------|---------------|---------------|------------------|-------------------|--------------------|---------------------|---------|
|                     |               | uu                |               |               |               |               | ux            |               |               |               |               |               | xx                      |               |               | S <sub>sym</sub> | S <sub>asym</sub> | S' <sub>asym</sub> | S'' <sub>asym</sub> | IR int. |
| uu                  | <b>2875.0</b> | 0.0               | 0.0           | 0.0           | 0.0           | 0.0           | 0.0           | 0.0           | 0.0           | 0.0           | 0.0           | 0.0           | 1.1                     | 0.0           | 0.0           | 69.7             | -0.3              | 0.1                | 0.0                 | 0.0     |
|                     | 0.0           | <b>2877.0</b>     | 0.0           | 0.0           | 0.0           | 0.0           | 0.3           | -0.7          | -0.7          | -1.0          | -1.4          | -1.4          | 0.0                     | 0.0           | 0.0           | -0.1             | -19.4             | -15.2              | 45.2                | 0.0     |
|                     | 0.0           | 0.0               | <b>2877.0</b> | 0.0           | 0.0           | 0.0           | -0.5          | -0.7          | -1.0          | 1.2           | 0.8           | -0.9          | 0.0                     | 0.0           | 0.0           | 0.2              | 7.8               | -49.2              | -13.2               | 0.0     |
|                     | 0.0           | 0.0               | 0.0           | <b>2877.0</b> | 0.0           | 0.0           | -1.8          | 0.7           | -0.5          | -1.0          | 0.3           | -0.4          | 0.0                     | 0.0           | 0.0           | -0.4             | -47.1             | -1.9               | -20.9               | 0.0     |
|                     | 0.0           | 0.0               | 0.0           | 0.0           | <b>2878.0</b> | 0.0           | 0.0           | 0.0           | 0.0           | 0.0           | 0.0           | 0.0           | 0.0                     | 1.7           | -0.2          | 0.0              | -0.1              | -0.4               | -1.0                | 0.0     |
|                     | 0.0           | 0.0               | 0.0           | 0.0           | 0.0           | <b>2878.0</b> | 0.1           | 0.0           | 0.0           | 0.0           | 0.0           | 0.0           | 0.0                     | -0.2          | -1.6          | -0.2             | 0.6               | 1.0                | 0.7                 | 0.0     |
| ux                  | 0.0           | 0.3               | -0.5          | -1.8          | 0.0           | 0.1           | <b>3108.5</b> | -0.2          | 0.5           | 0.3           | -0.5          | 0.1           | 0.0                     | 0.0           | 0.0           | 0.0              | 26.9              | 9.6                | 21.6                | 0.2     |
|                     | 0.0           | -0.7              | -0.7          | 0.7           | 0.0           | 0.0           | -0.2          | <b>3107.9</b> | 0.3           | -0.5          | 0.1           | 0.5           | 0.0                     | 0.0           | 0.0           | 0.0              | -8.7              | 19.8               | -11.7               | 0.1     |
|                     | 0.0           | -0.7              | -1.0          | -0.5          | 0.0           | 0.0           | 0.5           | 0.3           | <b>3107.9</b> | -0.1          | 0.0           | 0.5           | 0.0                     | 0.0           | 0.0           | 0.0              | 10.9              | 21.1               | -1.0                | 0.1     |
|                     | 0.0           | -1.0              | 1.2           | -1.0          | 0.0           | 0.0           | 0.3           | -0.5          | -0.1          | <b>3108.5</b> | 0.5           | 0.0           | 0.0                     | 0.0           | 0.0           | 0.0              | 28.7              | -18.5              | -12.0               | 0.2     |
|                     | 0.0           | -1.4              | 0.8           | 0.3           | 0.0           | 0.0           | -0.5          | 0.1           | 0.0           | 0.5           | <b>3108.2</b> | 0.3           | 0.0                     | 0.0           | 0.0           | 0.0              | 5.5               | -6.1               | -30.1               | 0.2     |
|                     | 0.0           | -1.4              | -0.9          | -0.4          | 0.0           | 0.0           | 0.1           | 0.5           | 0.5           | 0.0           | 0.3           | <b>3108.2</b> | 0.0                     | 0.0           | 0.0           | 0.0              | 10.4              | 23.9               | -15.0               | 0.2     |
| xx                  | 1.1           | 0.0               | 0.0           | 0.0           | 0.0           | 0.0           | 0.0           | 0.0           | 0.0           | 0.0           | 0.0           | 0.0           | <b>3339.5</b>           | 0.0           | 0.0           | -14.1            | 0.0               | 0.0                | 0.0                 | 0.0     |
|                     | 0.0           | 0.0               | 0.0           | 0.0           | 1.7           | -0.2          | 0.0           | 0.0           | 0.0           | 0.0           | 0.0           | 0.0           | 0.0                     | <b>3343.6</b> | 0.0           | 0.0              | 0.0               | 0.0                | 0.0                 | 0.0     |
|                     | 0.0           | 0.0               | 0.0           | 0.0           | -0.2          | -1.6          | 0.0           | 0.0           | 0.0           | 0.0           | 0.0           | 0.0           | 0.0                     | 0.0           | <b>3344.1</b> | 0.4              | 0.0               | 0.0                | 0.0                 | 0.0     |
| S <sub>sym</sub>    | <b>69.7</b>   | -0.1              | 0.2           | -0.4          | 0.0           | -0.2          | 0.0           | 0.0           | 0.0           | 0.0           | 0.0           | 0.0           | -14.1                   | 0.0           | 0.4           | <b>3209.3</b>    | 0.0               | 0.0                | 0.0                 | 0.0     |
| S <sub>asym</sub>   | -0.3          | -19.4             | 7.8           | -47.1         | -0.1          | 0.6           | 26.9          | -8.7          | 10.9          | 28.7          | 5.5           | 10.4          | 0.0                     | 0.0           | 0.0           | 0.0              | <b>3320.9</b>     | 0.0                | 0.0                 | 200.9   |
| S' <sub>asym</sub>  | 0.1           | -15.2             | -49.2         | -1.9          | -0.4          | 1.0           | 9.6           | 19.8          | 21.1          | -18.5         | -6.1          | 23.9          | 0.0                     | 0.0           | 0.0           | 0.0              | 0.0               | <b>3320.9</b>      | 0.0                 | 201.0   |
| S'' <sub>asym</sub> | 0.0           | 45.2              | -13.2         | -20.9         | -1.0          | 0.7           | 21.6          | -11.7         | -1.0          | -12.0         | -30.1         | -15.0         | 0.0                     | 0.0           | 0.0           | 0.0              | 0.0               | 0.0                | <b>3321.0</b>       | 201.0   |

<sup>a</sup> Notations for NH vibrational modes: u, umbrella; x, scissoring; s<sub>b</sub>, H-bonded stretching; s<sub>sym</sub>, totally symmetric stretching; s<sub>asym</sub>, asymmetric stretching.



**Table S5.** The original frequencies (in  $\text{cm}^{-1}$ ) of NH stretching fundamentals and bending overtones, the coupling constants (in  $\text{cm}^{-1}$ ) between them, and the original IR intensities of stretching fundamentals (in  $\text{km/mol}$ ) that involved in Fermi resonance in  $\text{NH}_4^+ \dots \text{Ar}_n$  clusters.<sup>a</sup>

| $\text{NH}_4^+ \dots \text{Ar}$ |      | uu    |       |       |       |      |       | ux   |      |       |       |       |       | xx   |      |      | Original |
|---------------------------------|------|-------|-------|-------|-------|------|-------|------|------|-------|-------|-------|-------|------|------|------|----------|
| $\text{C}_{3v}$                 |      | 2913  | 2925  | 2925  | 2937  | 2939 | 2940  | 3153 | 3153 | 3167  | 3166  | 3166  | 3167  | 3395 | 3401 | 3400 | IR int.  |
| $s_{\text{sym}}$                | 3209 | 27.3  | 1.4   | 0.0   | -60.5 | 0.1  | -0.6  | 0.0  | -0.6 | 1.7   | -13.2 | -12.7 | -1.6  | 14.9 | 0.3  | 0.0  | 147      |
| $s_{\text{b,asym}}$             | 3293 | -54.5 | 0.6   | -0.2  | -6.7  | 0.2  | -1.9  | 0.0  | 0.9  | 3.6   | -28.7 | -30.7 | -4.0  | -7.4 | -0.1 | 0.0  | 324      |
| $s_{\text{f,asym}}$             | 3340 | 2.0   | -29.0 | 2.2   | -0.7  | -3.8 | -40.2 | -6.6 | 33.6 | -0.8  | 23.6  | -21.7 | -0.6  | 0.6  | 0.0  | 0.0  | 188      |
| $s'_{\text{f,asym}}$            | 3341 | 0.5   | -2.0  | -30.9 | 0.0   | 42.3 | -3.6  | 32.3 | 6.6  | -23.6 | -0.7  | 1.0   | -22.6 | 0.1  | 0.0  | -0.1 | 188      |

  

| $\text{NH}_4^+ \dots \text{Ar}_2$   |      | uu    |      |       |      |      |      | ux   |       |       |      |      |       | xx   |      |      | Original |
|-------------------------------------|------|-------|------|-------|------|------|------|------|-------|-------|------|------|-------|------|------|------|----------|
| $\text{C}_{2v}$                     |      | 2916  | 2926 | 2933  | 2933 | 2942 | 2950 | 3158 | 3159  | 3167  | 3168 | 3175 | 3175  | 3400 | 3406 | 3407 | IR int.  |
| $s_{\text{sym}}$                    | 3209 | -36.5 | 0.0  | -38.9 | 0.0  | 0.0  | 42.5 | 0.0  | 0.0   | -12.1 | 0.0  | 0.0  | 0.0   | 15.9 | 0.0  | -0.9 | 75       |
| $s_{\text{b,asym}}$                 | 3265 | 0.0   | 53.5 | 0.0   | 0.0  | 0.0  | 0.0  | 23.2 | 0.0   | 0.0   | 0.0  | 0.0  | -38.7 | 0.0  | 0.0  | 0.0  | 548      |
| $s_{\text{b,sym}}/s_{\text{f,sym}}$ | 3318 | 44.6  | 0.0  | 6.7   | 0.0  | 0.0  | 25.4 | 0.0  | 0.0   | -45.6 | 0.0  | 0.0  | 0.0   | -4.7 | 0.0  | 0.3  | 265      |
| $s_{\text{f,asym}}$                 | 3346 | 0.0   | 0.0  | 0.0   | 0.0  | 52.1 | 0.0  | 0.0  | -40.4 | 0.0   | 0.0  | 21.9 | 0.0   | 0.0  | 0.0  | 0.0  | 175      |

  

| $\text{NH}_4^+ \dots \text{Ar}_3$ |      | uu    |       |      |       |       |       | ux    |      |       |       |      |       | xx   |      |      | Original |
|-----------------------------------|------|-------|-------|------|-------|-------|-------|-------|------|-------|-------|------|-------|------|------|------|----------|
| $\text{C}_{3v}$                   |      | 2927  | 2929  | 2930 | 2941  | 2941  | 2954  | 3168  | 3168 | 3168  | 3168  | 3180 | 3180  | 3406 | 3412 | 3412 | IR int.  |
| $s_{\text{sym}}$                  | 3210 | -56.5 | 0.0   | 0.4  | -0.6  | -0.3  | 40.0  | 1.3   | -3.8 | 5.2   | 1.5   | 0.6  | -0.9  | 16.4 | 0.3  | 0.0  | 30       |
| $s_{\text{b,asym}}$               | 3277 | 0.7   | 10.5  | 37.4 | -32.5 | 4.3   | -1.7  | -13.8 | 19.5 | 19.0  | 13.7  | 4.9  | -30.8 | -0.6 | 0.0  | 0.0  | 511      |
| $s'_{\text{b,asym}}$              | 3278 | 0.7   | -42.5 | 9.2  | -5.0  | -30.1 | -0.5  | 18.0  | 13.3 | 13.5  | -18.4 | 31.3 | 5.5   | -0.4 | 0.0  | -0.1 | 512      |
| $s_{\text{f}}$                    | 3338 | -34.0 | 0.0   | 0.2  | 1.6   | -0.3  | -35.4 | -9.4  | 31.2 | -30.4 | -9.3  | 0.1  | 0.4   | 2.3  | 0.0  | 0.0  | 207      |

Table S5. (continued)

| NH <sub>4</sub> <sup>+</sup> ...Ar <sub>4</sub> I  |      | uu    |       |       |       |       | ux    |       |       |       |       |       | xx    |       |      | Original |         |
|----------------------------------------------------|------|-------|-------|-------|-------|-------|-------|-------|-------|-------|-------|-------|-------|-------|------|----------|---------|
| T <sub>d</sub>                                     |      | 2937  | 2940  | 2941  | 2941  | 2941  | 2942  | 3176  | 3176  | 3176  | 3176  | 3177  | 3176  | 3411  | 3417 | 3417     | IR int. |
| s <sub>sym</sub>                                   | 3212 | -69.6 | 0.7   | 4.9   | -0.3  | 3.0   | -3.0  | -0.5  | -0.4  | 0.3   | -0.1  | 0.1   | 0.7   | -16.8 | 0.0  | 0.0      | 0       |
| S <sub>b,asym</sub>                                | 3285 | -0.4  | 3.6   | -11.9 | 33.6  | -26.2 | -24.0 | 8.0   | -12.1 | 27.6  | -18.5 | 10.9  | 25.4  | 0.3   | 0.0  | 0.0      | 480     |
| S' <sub>b,asym</sub>                               | 3286 | 3.5   | -4.0  | -1.4  | -14.9 | 24.0  | -41.2 | -35.5 | -16.5 | 2.6   | 18.4  | 4.4   | 11.6  | 0.4   | 0.0  | 0.0      | 480     |
| S'' <sub>b,asym</sub>                              | 3287 | 0.7   | 31.1  | 17.5  | -27.0 | -27.5 | -9.6  | 9.9   | -14.0 | 18.8  | 16.3  | 19.7  | -28.0 | -0.2  | 0.0  | 0.0      | 480     |
| NH <sub>4</sub> <sup>+</sup> ...Ar <sub>4</sub> II |      | uu    |       |       |       |       | ux    |       |       |       |       |       | xx    |       |      | Original |         |
| C <sub>3v</sub>                                    |      | 2926  | 2928  | 2929  | 2934  | 2934  | 2941  | 3164  | 3164  | 3164  | 3164  | 3170  | 3170  | 3400  | 3406 | 3405     | IR int. |
| s <sub>sym</sub>                                   | 3216 | 60.6  | 0.0   | -0.6  | 0.1   | 0.0   | -34.5 | 0.1   | -3.6  | -5.1  | -0.1  | 0.0   | 1.1   | 16.5  | 0.3  | 0.0      | 17      |
| S <sub>b,asym</sub>                                | 3283 | 0.5   | 0.1   | 37.8  | 34.1  | 0.1   | -2.3  | 0.1   | -24.6 | 23.5  | 0.1   | 0.3   | -30.0 | 0.7   | 0.3  | 0.0      | 480     |
| S' <sub>b,asym</sub>                               | 3284 | 0.0   | -45.3 | 0.1   | 0.0   | 28.6  | 0.0   | 21.5  | 0.1   | -0.1  | 22.8  | -32.0 | -0.3  | 0.0   | 0.0  | -0.3     | 480     |
| S <sub>f</sub>                                     | 3343 | -29.9 | 0.0   | 0.5   | -3.1  | 0.0   | -38.6 | 0.5   | -33.5 | -32.7 | -0.5  | 0.0   | 1.2   | -2.7  | 0.0  | 0.0      | 194     |
| NH <sub>4</sub> <sup>+</sup> ...Ar <sub>5</sub>    |      | uu    |       |       |       |       | ux    |       |       |       |       |       | xx    |       |      | Original |         |
| C <sub>3v</sub>                                    |      | 2928  | 2933  | 2933  | 2935  | 2937  | 2937  | 3169  | 3169  | 3172  | 3171  | 3171  | 3172  | 3406  | 3412 | 3413     | IR int. |
| s <sub>sym</sub>                                   | 3220 | 54.4  | 0.0   | -0.7  | -44.4 | 0.6   | -0.5  | 0.6   | 0.5   | -0.5  | 1.6   | -1.1  | 0.5   | -16.9 | 0.3  | 0.0      | 1       |
| S <sub>b,asym</sub>                                | 3291 | -17.6 | -19.6 | 13.0  | -21.5 | -16.2 | -30.8 | -11.3 | -23.5 | 10.2  | 3.1   | -33.9 | -10.1 | -0.4  | 0.2  | -0.1     | 485     |
| S' <sub>b,asym</sub>                               | 3291 | 6.2   | -18.4 | -25.8 | 8.7   | 32.4  | -23.9 | 24.0  | -19.0 | -17.2 | -22.0 | -6.8  | 16.3  | 0.2   | 0.2  | 0.2      | 485     |
| S'' <sub>b,asym</sub>                              | 3295 | -25.9 | 12.8  | -16.5 | -28.6 | 20.8  | 12.9  | 15.0  | 11.9  | -12.8 | 32.5  | -20.3 | 11.3  | 0.5   | -0.1 | 0.1      | 506     |

<sup>a</sup> Notations for NH vibrational modes: u, umbrella; x, scissoring; s<sub>sym</sub>, totally symmetric NH stretching; s<sub>b</sub>, H-bonded NH stretching (s<sub>b,sym</sub> for symmetric and s<sub>b,asym</sub> for asymmetric); s<sub>f</sub>, free NH stretching (s<sub>f,sym</sub> for symmetric and s<sub>f,asym</sub> for asymmetric).

**Table S6.** The original frequencies (in  $\text{cm}^{-1}$ ) of NH stretching fundamentals and bending overtones, the coupling constants (in  $\text{cm}^{-1}$ ) between them, and the original IR intensities of stretching fundamentals (in  $\text{km/mol}$ ) that involved in Fermi resonance in  $\text{NH}_4^+ \dots \text{Ne}_n$  clusters.<sup>a</sup>

| $\text{NH}_4^+ \dots \text{Ne}$     |      | uu    |       |       |       |       |       | ux    |       |       |       |       |       | xx    |      |      | Original |
|-------------------------------------|------|-------|-------|-------|-------|-------|-------|-------|-------|-------|-------|-------|-------|-------|------|------|----------|
| $\text{C}_{3v}$                     |      | 2923  | 2927  | 2927  | 2931  | 2932  | 2933  | 3159  | 3159  | 3164  | 3164  | 3164  | 3164  | 3395  | 3400 | 3401 | IR int.  |
| $s_{\text{sym}}$                    | 3242 | -55.5 | -1.0  | 0.1   | 43.4  | 0.0   | -2.8  | 0.0   | 0.0   | 0.0   | 0.4   | -0.4  | 0.0   | 16.1  | 0.0  | 0.4  | 2        |
| $s_{b,\text{asym}}$                 | 3329 | -31.1 | 0.8   | 0.0   | -39.5 | 0.0   | 1.5   | 0.0   | 0.4   | 0.6   | -31.0 | 30.4  | 0.6   | -0.7  | 0.0  | 0.0  | 283      |
| $s_{f,\text{asym}}$                 | 3334 | 0.0   | -1.6  | -25.5 | -0.1  | -42.6 | -0.9  | -29.7 | 0.6   | -20.5 | 0.0   | 0.0   | 20.2  | 0.0   | 0.0  | 0.0  | 196      |
| $s'_{f,\text{asym}}$                | 3334 | 0.7   | -26.6 | 1.7   | -2.7  | 0.9   | -41.8 | 0.6   | 30.2  | 0.0   | -20.5 | -21.0 | 0.0   | -0.1  | 0.0  | 0.0  | 196      |
| $\text{NH}_4^+ \dots \text{Ne}_2$   |      | uu    |       |       |       |       |       | ux    |       |       |       |       |       | xx    |      |      | Original |
| $\text{C}_{2v}$                     |      | 2925  | 2930  | 2931  | 2933  | 2936  | 2939  | 3164  | 3164  | 3166  | 3167  | 3170  | 3170  | 3401  | 3406 | 3407 | IR int.  |
| $s_{\text{sym}}$                    | 3242 | 55.6  | 0.0   | 32.8  | 0.0   | 0.0   | -28.6 | 0.0   | 0.0   | 0.4   | 0.0   | 0.0   | 0.0   | -16.2 | 0.0  | 0.4  | 3        |
| $s_{b,\text{asym}}$                 | 3329 | 0.0   | -50.7 | 0.0   | 0.0   | 0.0   | 0.0   | -21.5 | 0.0   | 0.0   | 0.0   | 0.0   | 36.8  | 0.0   | 0.0  | 0.0  | 309      |
| $s_{b,\text{sym}}/s_{f,\text{sym}}$ | 3334 | 28.0  | 0.0   | -13.3 | 0.0   | 0.0   | 39.1  | 0.0   | 0.0   | -43.7 | 0.0   | 0.0   | 0.0   | 0.7   | 0.0  | 0.0  | 246      |
| $s_{f,\text{asym}}$                 | 3334 | 0.0   | 0.0   | 0.0   | 0.0   | -49.4 | 0.0   | 0.0   | 35.9  | 0.0   | 0.0   | -19.8 | 0.0   | 0.0   | 0.0  | 0.0  | 192      |
| $\text{NH}_4^+ \dots \text{Ne}_3$   |      | uu    |       |       |       |       |       | ux    |       |       |       |       |       | xx    |      |      | Original |
| $\text{C}_{3v}$                     |      | 2931  | 2933  | 2934  | 2938  | 2938  | 2944  | 3170  | 3170  | 3170  | 3170  | 3175  | 3175  | 3406  | 3412 | 3412 | IR int.  |
| $s_{\text{sym}}$                    | 3250 | -64.2 | 1.4   | -2.1  | -0.7  | 0.5   | 29.5  | 0.1   | 0.1   | 0.0   | -0.1  | 0.0   | 0.0   | 16.3  | 0.1  | -0.3 | 3        |
| $s_{b,\text{asym}}$                 | 3334 | -1.4  | -10.0 | 37.0  | -26.2 | -19.7 | -0.2  | -18.0 | -11.8 | 11.5  | -17.8 | 28.3  | -8.8  | 0.0   | 0.0  | 0.0  | 309      |
| $s'_{b,\text{asym}}$                | 3334 | -1.5  | -37.3 | -10.1 | 19.9  | -26.8 | -0.8  | 10.9  | -18.7 | 17.6  | 12.8  | -9.1  | -28.8 | 0.1   | 0.0  | 0.0  | 246      |
| $s_f$                               | 3339 | 20.6  | -1.4  | 0.5   | 0.4   | -0.8  | 44.8  | 26.9  | 12.3  | 13.4  | -26.5 | 0.0   | -0.8  | 0.6   | 0.0  | 0.0  | 192      |

**Table S6.** (continued)

| NH <sub>4</sub> <sup>+</sup> ...Ne <sub>4</sub> I  |      | uu    |       |       |       |      |       | ux    |       |       |       |       |       | xx    |      |      | Original |         |
|----------------------------------------------------|------|-------|-------|-------|-------|------|-------|-------|-------|-------|-------|-------|-------|-------|------|------|----------|---------|
| T <sub>d</sub>                                     |      | 2937  | 2940  | 2940  | 2941  | 2941 | 2941  | 3177  | 3177  | 3177  | 3177  | 3177  | 3177  | 3177  | 3412 | 3417 | 3418     | IR int. |
| S <sub>sym</sub>                                   | 3254 | 71.2  | -0.1  | 0.2   | -0.1  | 0.0  | -0.1  | 0.0   | 0.0   | 0.0   | 0.0   | 0.0   | 0.0   | 0.0   | 0.0  | 0.0  | -0.4     | 0       |
| S <sub>b,asym</sub>                                | 3339 | -0.1  | -0.2  | 0.0   | -20.2 | 40.5 | -24.2 | 5.3   | -14.9 | 14.1  | -33.6 | -16.2 | -3.7  | 0.0   | 0.0  | 0.0  | 0.0      | 480     |
| S' <sub>b,asym</sub>                               | 3339 | 0.1   | -0.1  | -0.1  | 14.5  | 30.4 | 38.7  | -30.9 | -4.9  | 21.7  | 5.6   | -2.6  | 19.3  | 0.0   | 0.0  | 0.0  | 0.0      | 480     |
| S'' <sub>b,asym</sub>                              | 3339 | 0.0   | -0.1  | -0.4  | 44.9  | 8.4  | -23.4 | 21.5  | -13.0 | 4.8   | -1.3  | 19.4  | 28.7  | 0.0   | 0.0  | 0.0  | 0.0      | 480     |
| NH <sub>4</sub> <sup>+</sup> ...Ne <sub>4</sub> II |      | uu    |       |       |       |      |       | ux    |       |       |       |       |       | xx    |      |      | Original |         |
| C <sub>3v</sub>                                    |      | 2931  | 2933  | 2934  | 2937  | 2937 | 2941  | 3169  | 3169  | 3169  | 3169  | 3172  | 3172  | 3404  | 3410 | 3410 | IR int.  |         |
| S <sub>sym</sub>                                   | 3253 | -66.1 | 0.1   | 3.0   | -0.8  | 0.1  | 25.7  | 0.0   | 0.0   | 0.0   | 0.0   | 0.0   | 0.0   | -16.4 | -0.1 | 0.3  | 17       |         |
| S <sub>b,asym</sub>                                | 3337 | 0.1   | 37.0  | 0.1   | 1.4   | 34.7 | 0.1   | 21.1  | 4.7   | 4.5   | -20.9 | 28.2  | 8.1   | 0.0   | -0.3 | -0.1 | 480      |         |
| S' <sub>b,asym</sub>                               | 3337 | 1.8   | -0.1  | 37.0  | 34.5  | -1.5 | 0.8   | -5.0  | 22.2  | 20.6  | 4.5   | 8.2   | -28.6 | 0.1   | -0.1 | 0.3  | 480      |         |
| S <sub>f</sub>                                     | 3343 | 18.1  | 0.0   | -1.2  | -0.8  | -0.1 | 46.1  | -8.9  | 28.2  | -29.1 | -9.0  | -0.3  | 0.7   | -0.6  | 0.0  | 0.0  | 194      |         |
| NH <sub>4</sub> <sup>+</sup> ...Ne <sub>5</sub>    |      | uu    |       |       |       |      |       | ux    |       |       |       |       |       | xx    |      |      | Original |         |
| C <sub>3v</sub>                                    |      | 2936  | 2939  | 2939  | 2940  | 2940 | 2941  | 3174  | 3175  | 3176  | 3175  | 3175  | 3176  | 3410  | 3416 | 3416 | IR int.  |         |
| S <sub>sym</sub>                                   | 3257 | 69.3  | 0.0   | 0.1   | -15.7 | 0.1  | 2.7   | 0.0   | 0.0   | 0.0   | -0.1  | 0.2   | 0.0   | -16.6 | 0.0  | -0.4 | 0        |         |
| S <sub>b,asym</sub>                                | 3340 | -0.1  | -21.5 | 2.0   | -0.3  | 45.6 | -1.1  | 28.8  | 4.9   | 21.3  | 1.6   | 1.9   | -20.9 | 0.0   | 0.4  | 0.0  | 285      |         |
| S' <sub>b,asym</sub>                               | 3340 | 0.4   | -2.1  | -24.0 | 10.4  | 1.1  | 43.0  | 5.0   | -29.3 | -2.3  | 24.3  | 18.3  | 1.2   | 0.2   | 0.0  | -0.4 | 285      |         |
| S'' <sub>b,asym</sub>                              | 3342 | -10.6 | -0.3  | -5.7  | -48.1 | -0.1 | 8.6   | 0.3   | -2.8  | 4.9   | -28.1 | 32.1  | 5.5   | -0.2  | 0.0  | 0.0  | 298      |         |

<sup>a</sup> Notations for NH vibrational modes: u, umbrella; x, scissoring; S<sub>sym</sub>, totally symmetric NH stretching; S<sub>b</sub>, H-bonded NH stretching (S<sub>b,sym</sub> for symmetric and S<sub>b,asym</sub> for asymmetric); S<sub>f</sub>, free NH stretching (S<sub>f,sym</sub> for symmetric and S<sub>f,asym</sub> for asymmetric).

**Table S7.** The original frequencies (in  $\text{cm}^{-1}$ ) of NH stretching fundamentals and bending overtones, the coupling constants (in  $\text{cm}^{-1}$ ) between them, and the original IR intensities of stretching fundamentals (in  $\text{km/mol}$ ) that involved in Fermi resonance in  $\text{NH}_4^+ \dots \text{Kr}_n$  clusters.<sup>a</sup>

| $\text{NH}_4^+ \dots \text{Kr}$ |      | uu    |       |       |       |       |       | ux    |      |      |       |       |       | xx    |      |      | Original |
|---------------------------------|------|-------|-------|-------|-------|-------|-------|-------|------|------|-------|-------|-------|-------|------|------|----------|
| $\text{C}_{3v}$                 |      | 2898  | 2920  | 2920  | 2939  | 2942  | 2942  | 3147  | 3147 | 3168 | 3168  | 3168  | 3168  | 3395  | 3400 | 3401 | IR int.  |
| $s_{\text{sym}}$                | 3158 | 7.6   | 0.0   | 0.0   | -59.7 | -0.2  | 0.0   | 0.0   | 0.0  | 13.9 | -8.7  | -8.7  | -13.9 | 10.7  | 0.0  | 0.3  | 438      |
| $s_{\text{b,asym}}$             | 3279 | -60.4 | 0.0   | 0.0   | 10.9  | 0.1   | 0.0   | 0.0   | 0.0  | 19.4 | -12.2 | -12.2 | -19.5 | -10.7 | 0.0  | -0.3 | 274      |
| $s_{\text{f,asym}}$             | 3342 | 0.0   | -26.7 | -0.9  | 0.0   | -2.2  | -40.8 | -24.5 | 17.1 | -8.6 | -18.0 | 18.3  | -8.7  | 0.0   | 0.3  | 0.0  | 179      |
| $s'_{\text{f,asym}}$            | 3343 | -0.2  | 0.9   | -26.8 | 0.2   | -40.7 | 2.2   | 17.3  | 25.0 | 18.4 | -8.8  | 9.0   | 18.7  | -0.1  | 0.0  | 0.3  | 179      |

  

| $\text{NH}_4^+ \dots \text{Kr}_2$   |      | uu    |      |       |      |      |       | ux    |      |       |      |       |      | xx    |      |      | Original |
|-------------------------------------|------|-------|------|-------|------|------|-------|-------|------|-------|------|-------|------|-------|------|------|----------|
| $\text{C}_{2v}$                     |      | 2900  | 2916 | 2927  | 2929 | 2943 | 2956  | 3151  | 3152 | 3165  | 3166 | 3179  | 3180 | 3401  | 3406 | 3407 | IR int.  |
| $s_{\text{sym}}$                    | 3170 | -24.8 | 0.0  | -35.7 | 0.0  | 0.0  | 46.3  | 0.0   | 0.0  | 15.0  | 0.0  | 0.0   | 0.0  | -12.5 | 0.0  | 1.7  | 198      |
| $s_{\text{b,asym}}$                 | 3204 | 0.0   | 51.7 | 0.0   | 0.0  | 0.0  | 0.0   | -19.9 | 0.0  | 0.0   | 0.0  | 0.0   | 33.4 | 0.0   | 0.0  | 0.0  | 838      |
| $s_{\text{b,sym}}/s_{\text{f,sym}}$ | 3314 | -49.9 | 0.0  | -16.3 | 0.0  | 0.0  | -17.3 | 0.0   | 0.0  | -39.0 | 0.0  | 0.0   | 0.0  | -7.4  | 0.0  | 0.3  | 258      |
| $s_{\text{f,asym}}$                 | 3352 | 0.0   | 0.0  | 0.0   | 0.0  | 48.0 | 0.0   | 0.0   | 36.2 | 0.0   | 0.0  | -19.5 | 0.0  | 0.0   | 0.0  | 0.0  | 160      |

  

| $\text{NH}_4^+ \dots \text{Kr}_3$ |      | uu   |      |      |       |       |       | ux   |       |       |       |      |       | xx   |      |      | Original |
|-----------------------------------|------|------|------|------|-------|-------|-------|------|-------|-------|-------|------|-------|------|------|------|----------|
| $\text{C}_{3v}$                   |      | 2914 | 2917 | 2917 | 2938  | 2938  | 2958  | 3162 | 3162  | 3162  | 3162  | 3183 | 3183  | 3406 | 3411 | 3412 | IR int.  |
| $s_{\text{sym}}$                  | 3181 | 48.9 | 0.2  | 0.0  | 0.0   | 0.0   | -43.6 | -5.9 | 1.8   | -1.9  | -5.9  | 0.0  | 0.0   | 13.4 | 0.0  | 0.4  | 75       |
| $s_{\text{b,asym}}$               | 3229 | 0.0  | -3.2 | 40.2 | -29.5 | 10.0  | 0.0   | 14.2 | 13.5  | 13.8  | -14.3 | 22.6 | -14.9 | 0.0  | -0.4 | 0.0  | 757      |
| $s'_{\text{b,asym}}$              | 3230 | -0.4 | 39.9 | 3.2  | -10.0 | -29.7 | 0.2   | 13.8 | -14.5 | -14.6 | -14.1 | 15.2 | 23.0  | -0.1 | 0.0  | -0.4 | 757      |
| $s_{\text{f}}$                    | 3345 | 41.2 | 0.1  | 0.0  | 0.0   | 0.0   | 29.4  | 27.4 | -8.7  | 8.7   | 27.4  | 0.0  | 0.1   | 4.6  | 0.0  | 0.1  | 195      |

Table S7. (continued)

| NH <sub>4</sub> <sup>+</sup> ...Kr <sub>4</sub> I  |      | uu    |       |       |       |       |       | ux    |       |       |       |       |       | xx    |      |      | Original |
|----------------------------------------------------|------|-------|-------|-------|-------|-------|-------|-------|-------|-------|-------|-------|-------|-------|------|------|----------|
| T <sub>d</sub>                                     |      | 2929  | 2932  | 2932  | 2933  | 2933  | 2933  | 3172  | 3172  | 3172  | 3172  | 3172  | 3172  | 3411  | 3417 | 3416 | IR int.  |
| S <sub>sym</sub>                                   | 3189 | 66.8  | 0.1   | 0.1   | 0.2   | -0.1  | 0.0   | 0.0   | 0.0   | 0.0   | 0.0   | 0.0   | 0.1   | -13.9 | 0.3  | 0.0  | 0        |
| S <sub>b,asym</sub>                                | 3250 | -0.4  | 0.2   | -0.4  | 46.2  | 8.5   | -18.1 | 13.8  | 4.9   | -27.0 | 0.7   | 1.8   | 24.2  | 0.2   | 0.0  | 0.0  | 693      |
| S' <sub>b,asym</sub>                               | 3251 | 0.2   | 1.3   | -0.2  | -19.9 | 18.0  | -42.7 | 12.4  | 27.0  | -9.0  | 3.5   | 7.4   | -23.4 | -0.1  | 0.0  | 0.0  | 692      |
| S'' <sub>b,asym</sub>                              | 3252 | 0.1   | 1.4   | 0.2   | 0.5   | -46.6 | -19.7 | -21.9 | -0.6  | -17.9 | 19.6  | -17.7 | -7.9  | -0.1  | 0.0  | 0.0  | 692      |
| NH <sub>4</sub> <sup>+</sup> ...Kr <sub>4</sub> II |      | uu    |       |       |       |       |       | ux    |       |       |       |       |       | xx    |      |      | Original |
| C <sub>3v</sub>                                    |      | 2923  | 2926  | 2926  | 2928  | 2929  | 2931  | 3163  | 3162  | 3162  | 3162  | 3165  | 3165  | 3398  | 3404 | 3404 | IR int.  |
| S <sub>sym</sub>                                   | 3188 | 63.0  | 0.3   | 2.9   | -0.3  | 2.2   | -24.1 | -5.0  | -0.8  | 0.1   | -6.8  | -2.3  | -0.2  | -14.9 | 0.0  | 0.0  | 23       |
| S <sub>b,asym</sub>                                | 3247 | -0.8  | 1.1   | -29.4 | -8.4  | 40.4  | -5.1  | -28.4 | 4.6   | 3.4   | 22.1  | 23.1  | -5.8  | -0.7  | 0.2  | -0.2 | 612      |
| S' <sub>b,asym</sub>                               | 3248 | 0.0   | 50.2  | -2.8  | -16.7 | -6.0  | 1.0   | -1.5  | -14.8 | -21.8 | 2.8   | -6.7  | -33.1 | 0.3   | 0.1  | 0.4  | 613      |
| S <sub>f</sub>                                     | 3344 | -26.3 | 0.0   | -2.0  | 0.1   | -7.7  | -41.4 | -32.1 | -2.5  | 2.7   | -32.6 | -7.4  | -0.3  | 4.7   | 0.0  | 0.0  | 174      |
| NH <sub>4</sub> <sup>+</sup> ...Kr <sub>5</sub>    |      | uu    |       |       |       |       |       | ux    |       |       |       |       |       | xx    |      |      | Original |
| C <sub>3v</sub>                                    |      | 2913  | 2928  | 2928  | 2938  | 2941  | 2941  | 3161  | 3161  | 3174  | 3174  | 3174  | 3173  | 3404  | 3411 | 3410 | IR int.  |
| S <sub>sym</sub>                                   | 3191 | 43.6  | -0.7  | -1.0  | -53.2 | -0.1  | 1.4   | 0.3   | 0.7   | 1.3   | 1.3   | 0.4   | -1.9  | 15.6  | -0.3 | 0.0  | 11       |
| S <sub>b,asym</sub>                                | 3262 | -25.9 | -12.1 | 19.2  | -21.5 | 2.0   | -30.0 | -7.7  | -20.7 | 27.8  | -3.3  | 23.8  | -11.7 | 0.4   | 0.1  | -0.2 | 552      |
| S' <sub>b,asym</sub>                               | 3264 | 5.2   | 23.3  | 19.9  | 3.1   | 41.0  | -5.1  | 26.7  | -13.5 | -20.1 | -16.1 | 11.7  | -12.3 | 0.0   | -0.2 | -0.2 | 562      |
| S'' <sub>b,asym</sub>                              | 3264 | 28.5  | -14.0 | 15.5  | 19.9  | -6.6  | -28.9 | -12.5 | -17.7 | -8.8  | -21.4 | -0.5  | 31.6  | 0.4   | 0.1  | -0.2 | 548      |

<sup>a</sup> Notations for NH vibrational modes: u, umbrella; x, scissoring; S<sub>sym</sub>, totally symmetric NH stretching; S<sub>b</sub>, H-bonded NH stretching (S<sub>b,sym</sub> for symmetric and S<sub>b,asym</sub> for asymmetric); S<sub>f</sub>, free NH stretching (S<sub>f,sym</sub> for symmetric and S<sub>f,asym</sub> for asymmetric).

**Table S8.** The original frequencies (in  $\text{cm}^{-1}$ ) of NH stretching fundamentals and bending overtones, the coupling constants (in  $\text{cm}^{-1}$ ) between them, and the original IR intensities of stretching fundamentals (in  $\text{km/mol}$ ) that involved in Fermi resonance in  $\text{NH}_4^+ \dots (\text{H}_2\text{O})_n$  clusters.<sup>a</sup>

| $\text{NH}_4^+ \dots \text{H}_2\text{O}$ |      | uu    |       |       |       |      | ux   |      |       |       |      |       | xx    |      |      | Original<br>IR int. |      |
|------------------------------------------|------|-------|-------|-------|-------|------|------|------|-------|-------|------|-------|-------|------|------|---------------------|------|
|                                          |      | 2793  | 2866  | 2893  | 2942  | 2970 | 2997 | 3075 | 3101  | 3150  | 3176 | 3178  | 3204  | 3362 | 3389 |                     | 3412 |
| $S_b$                                    | 2659 | 21.9  | 1.1   | 0.0   | 30.5  | 0.0  | 31.9 | 0.0  | 0.0   | 13.0  | 0.0  | 0.0   | -25.5 | 0.7  | 0.0  | -7.4                | 1487 |
| $S_{f,\text{sym}}$                       | 3264 | -62.4 | -0.7  | 0.0   | 20.5  | 0.0  | 20.2 | 0.1  | 0.0   | -17.5 | 0.0  | 0.0   | 18.0  | -8.9 | 0.0  | -4.5                | 88   |
| $S_{f,\text{asym}}$                      | 3352 | 0.0   | 0.0   | -17.2 | 0.0   | 42.0 | 0.0  | 0.0  | -31.9 | 0.0   | 14.6 | -17.6 | 0.0   | 0.0  | 0.8  | 0.0                 | 142  |
| $S'_{f,\text{asym}}$                     | 3353 | 0.7   | -24.7 | 0.0   | -27.2 | 0.0  | 31.5 | 31.8 | 0.0   | 20.2  | 0.0  | 0.0   | 14.1  | 0.3  | 0.0  | 0.7                 | 145  |

  

| $\text{NH}_4^+ \dots (\text{H}_2\text{O})_2$ |      | uu    |      |      |       |       | ux    |       |      |       |      |      | xx    |      |      | Original<br>IR int. |      |
|----------------------------------------------|------|-------|------|------|-------|-------|-------|-------|------|-------|------|------|-------|------|------|---------------------|------|
|                                              |      | 2850  | 2895 | 2941 | 2944  | 2990  | 3038  | 3136  | 3142 | 3183  | 3186 | 3231 | 3234  | 3425 | 3432 |                     | 3434 |
| $S_{b,\text{sym}}$                           | 2888 | 1.4   | 20.1 | 29.4 | 0.0   | 0.0   | 38.4  | -9.1  | -0.4 | -24.7 | -1.1 | 0.2  | -6.9  | -8.6 | 0.4  | -0.1                | 892  |
| $S_{b,\text{asym}}$                          | 2889 | 21.6  | 42.0 | 9.0  | 0.0   | -0.1  | -22.9 | -20.9 | -1.0 | -1.2  | 0.0  | 1.3  | -30.7 | 1.8  | 1.0  | -8.4                | 1404 |
| $S_{f,\text{sym}}$                           | 3316 | -47.6 | 4.9  | 32.3 | 0.1   | -0.1  | -7.3  | -8.8  | -0.4 | 31.3  | 1.4  | 0.2  | -3.6  | -4.6 | -0.2 | 2.5                 | 128  |
| $S_{f,\text{asym}}$                          | 3373 | 0.0   | 0.0  | 0.0  | -15.5 | -42.0 | 0.0   | -1.5  | 31.3 | -0.5  | 10.6 | 13.6 | 0.6   | 0.0  | 0.5  | 0.1                 | 107  |

  

| $\text{NH}_4^+ \dots (\text{H}_2\text{O})_3 \text{ I}$ |      | uu    |      |       |      |      | ux    |       |      |      |      |       | xx    |      |      | Original<br>IR int. |      |
|--------------------------------------------------------|------|-------|------|-------|------|------|-------|-------|------|------|------|-------|-------|------|------|---------------------|------|
|                                                        |      | 2930  | 2930 | 2931  | 2990 | 2990 | 3048  | 3196  | 3196 | 3196 | 3197 | 3254  | 3255  | 3460 | 3466 |                     | 3465 |
| $S_{b,\text{sym}}$                                     | 3014 | -36.9 | 0.2  | 0.6   | -0.1 | 0.3  | -43.1 | -7.9  | 4.0  | -3.6 | -8.0 | 0.0   | -0.2  | 10.8 | 0.2  | 0.0                 | 204  |
| $S_{b,\text{asym}}$                                    | 3033 | -0.6  | 6.9  | -38.6 | 34.8 | -1.0 | 0.0   | -20.0 | 8.4  | 8.4  | 20.4 | -24.3 | -8.4  | 0.0  | 1.6  | 4.3                 | 1251 |
| $S'_{b,\text{asym}}$                                   | 3033 | 0.2   | 38.8 | 6.7   | 1.5  | 34.7 | 0.2   | 8.1   | 20.3 | 20.1 | -7.4 | 7.6   | -24.4 | 0.0  | 4.2  | -1.7                | 1251 |
| $S_f$                                                  | 3363 | -43.7 | -0.1 | 0.7   | 0.0  | 0.0  | 21.0  | 23.7  | -0.6 | 0.6  | 23.7 | 0.0   | 0.0   | 2.2  | 0.0  | 0.0                 | 105  |

**Table S8.** (continued)

| NH <sub>4</sub> <sup>+</sup> ...(H <sub>2</sub> O) <sub>3</sub> II |      | uu    |      |      |       |       | ux    |       |      |      |       |      | xx   |      |      | Original |         |
|--------------------------------------------------------------------|------|-------|------|------|-------|-------|-------|-------|------|------|-------|------|------|------|------|----------|---------|
|                                                                    |      | 2759  | 2862 | 2890 | 2966  | 2995  | 3024  | 3060  | 3097 | 3163 | 3202  | 3191 | 3231 | 3363 | 3404 | 3440     | IR int. |
| S <sub>b,sym</sub>                                                 | 2850 | 0.0   | 52.7 | 0.0  | 0.0   | 0.0   | 0.0   | -21.5 | 0.0  | 0.0  | -24.2 | 0.0  | 0.0  | 0.0  | 0.0  | 1025     |         |
| S <sub>b,asym</sub>                                                | 2885 | -5.2  | 0.0  | 0.0  | -21.8 | 0.0   | -39.0 | 0.0   | 0.0  | 0.0  | -23.0 | 0.0  | 0.0  | 4.5  | 0.0  | 5.6      | 997     |
| S <sub>f,sym</sub>                                                 | 3327 | -52.2 | 0.0  | 0.0  | -35.2 | 0.0   | 6.6   | 0.0   | 0.0  | 0.0  | 30.2  | 0.0  | 0.0  | 6.8  | 0.0  | 1.4      | 167     |
| S <sub>f,asym</sub>                                                | 3387 | 0.0   | 0.0  | 0.0  | 0.0   | -46.6 | 0.0   | 37.8  | 0.0  | 0.0  | 0.0   | 0.0  | 11.1 | 0.0  | 0.0  | 0.0      | 102     |

  

| NH <sub>4</sub> <sup>+</sup> ...(H <sub>2</sub> O) <sub>3</sub> III |      | uu    |       |      |       |       | ux    |       |       |       |       |       | xx   |      |      | Original |         |
|---------------------------------------------------------------------|------|-------|-------|------|-------|-------|-------|-------|-------|-------|-------|-------|------|------|------|----------|---------|
|                                                                     |      | 2853  | 2910  | 2930 | 2970  | 2989  | 3006  | 3121  | 3159  | 3179  | 3218  | 3196  | 3237 | 3389 | 3431 | 3469     | IR int. |
| S <sub>b</sub>                                                      | 2644 | 15.9  | 28.5  | 0.0  | -29.1 | 0.0   | -24.7 | 0.0   | -15.1 | 0.0   | -23.0 | 12.2  | 0.0  | -1.5 | 0.0  | -5.8     | 1765    |
| s' <sub>b</sub>                                                     | 2958 | -31.6 | -32.0 | 0.0  | 2.3   | 0.0   | -30.6 | 0.0   | 27.6  | 0.0   | -6.4  | -19.2 | 0.0  | 3.9  | 0.0  | -6.6     | 933     |
| S <sub>f,sym</sub>                                                  | 3332 | 43.5  | -4.3  | 0.0  | 36.3  | 0.0   | -6.3  | 0.0   | 12.5  | 0.0   | -27.3 | -1.1  | 0.0  | -6.4 | 0.0  | 0.9      | 60      |
| S <sub>f,asym</sub>                                                 | 3391 | 0.0   | 0.0   | 15.2 | 0.0   | -43.9 | 0.0   | -32.2 | 0.0   | -11.4 | 0.0   | 0.0   | 11.8 | 0.0  | 0.1  | 0.0      | 97      |

  

| NH <sub>4</sub> <sup>+</sup> ...(H <sub>2</sub> O) <sub>4</sub> I |      | uu    |      |       |      |       | ux    |      |      |       |      |       | xx   |       |      | Original |         |
|-------------------------------------------------------------------|------|-------|------|-------|------|-------|-------|------|------|-------|------|-------|------|-------|------|----------|---------|
|                                                                   |      | 2988  | 2991 | 2992  | 2993 | 2993  | 2995  | 3241 | 3242 | 3243  | 3245 | 3243  | 3245 | 3491  | 3498 | 3498     | IR int. |
| S <sub>b,sym</sub>                                                | 3088 | -51.4 | -0.5 | -0.9  | 31.2 | 1.4   | 4.7   | 0.1  | 3.9  | 0.0   | -0.1 | 0.0   | 0.1  | -11.2 | -2.8 | 0.1      | 0       |
| S <sub>b,asym</sub>                                               | 3134 | -0.7  | 48.1 | -13.5 | -0.6 | -3.4  | -1.2  | 2.2  | -1.8 | -17.4 | -2.8 | -7.9  | 33.4 | 0.0   | 0.0  | -0.4     | 964     |
| s' <sub>b,asym</sub>                                              | 3134 | -2.4  | 13.5 | 47.7  | -3.2 | 0.3   | 5.6   | -4.9 | 1.0  | 8.8   | 32.9 | -17.5 | 3.6  | 0.0   | 0.0  | 0.9      | 964     |
| S'' <sub>b,asym</sub>                                             | 3135 | -1.1  | -0.8 | 5.5   | 6.0  | -22.3 | -45.0 | 39.0 | -0.2 | 1.1   | 5.3  | -0.1  | -1.5 | 0.0   | 0.0  | -5.7     | 967     |



**Table S8.** (continued)

| NH <sub>4</sub> <sup>+</sup> ...(H <sub>2</sub> O) <sub>4</sub> II |      | uu    |      |      |       |       | ux    |       |       |       |       |      | xx    |      |      | Original |         |
|--------------------------------------------------------------------|------|-------|------|------|-------|-------|-------|-------|-------|-------|-------|------|-------|------|------|----------|---------|
|                                                                    |      | 2875  | 2914 | 2949 | 2956  | 2990  | 3023  | 3146  | 3166  | 3186  | 3208  | 3220 | 3241  | 3419 | 3443 | 3463     | IR int. |
| S <sub>b,sym</sub>                                                 | 3013 | -16.1 | 0.1  | 0.2  | 32.3  | -8.3  | 37.1  | -2.4  | -0.1  | 0.0   | -14.1 | 0.1  | -11.4 | 6.9  | 0.0  | 6.6      | 462     |
| S <sub>b,asym</sub>                                                | 3006 | 0.0   | 31.3 | 37.4 | -0.1  | 0.0   | -0.2  | 0.1   | -19.1 | -20.7 | 0.0   | 18.0 | 0.1   | 0.0  | -0.3 | 0.0      | 758     |
| S' <sub>b,asym</sub>                                               | 3073 | 40.2  | 0.0  | 0.1  | 22.1  | -27.2 | -19.4 | 30.2  | 0.1   | 0.0   | -15.4 | 0.0  | -22.3 | -6.9 | -0.1 | 1.2      | 1281    |
| S <sub>f</sub>                                                     | 3371 | 32.8  | 0.0  | 0.0  | -32.4 | -11.7 | 19.8  | -26.7 | -0.1  | 0.1   | -21.3 | 0.1  | -4.8  | -2.4 | 0.0  | -0.6     | 116     |

  

| NH <sub>4</sub> <sup>+</sup> ...(H <sub>2</sub> O) <sub>4</sub> III |      | uu    |       |       |       |       | ux    |       |       |      |      |       | xx    |      |      | Original |         |
|---------------------------------------------------------------------|------|-------|-------|-------|-------|-------|-------|-------|-------|------|------|-------|-------|------|------|----------|---------|
|                                                                     |      | 2910  | 2939  | 2969  | 2973  | 3002  | 3036  | 3169  | 3203  | 3198 | 3233 | 3231  | 3265  | 3428 | 3465 | 3496     | IR int. |
| S <sub>b</sub>                                                      | 2847 | 9.3   | -9.5  | 34.4  | -27.1 | -0.4  | -24.5 | 5.3   | -9.5  | 12.7 | 19.1 | -9.1  | 13.5  | -1.2 | -1.5 | -5.6     | 1340    |
| S' <sub>b</sub>                                                     | 3060 | 40.1  | -10.4 | -7.7  | -25.3 | -8.2  | 30.8  | 15.1  | -12.0 | 12.3 | 2.4  | -10.6 | 8.9   | 6.4  | -1.5 | 6.5      | 560     |
| S'' <sub>b</sub>                                                    | 3082 | -11.0 | -27.7 | -19.6 | -9.9  | -27.8 | -18.0 | -12.4 | -21.3 | 16.1 | -9.9 | -5.1  | -24.5 | -0.2 | -2.7 | -1.0     | 1120    |
| S <sub>f</sub>                                                      | 3371 | 29.7  | -0.7  | -29.6 | 5.4   | 15.4  | -18.2 | -24.9 | 5.9   | 4.6  | 20.3 | 3.0   | 2.5   | 2.6  | 0.0  | 0.3      | 92      |

  

| NH <sub>4</sub> <sup>+</sup> ...(H <sub>2</sub> O) <sub>4</sub> IV |      | uu    |       |      |       |      | ux    |       |      |      |       |      | xx    |      |      | Original |         |
|--------------------------------------------------------------------|------|-------|-------|------|-------|------|-------|-------|------|------|-------|------|-------|------|------|----------|---------|
|                                                                    |      | 2749  | 2856  | 2888 | 2964  | 2997 | 3030  | 3053  | 3088 | 3160 | 3197  | 3192 | 3230  | 3359 | 3398 | 3433     | IR int. |
| S <sub>b,asym</sub>                                                | 2795 | 0.0   | -53.3 | -1.7 | 0.0   | 0.0  | 0.0   | 20.4  | -0.4 | 0.0  | 22.3  | 0.0  | 0.0   | -0.4 | 0.0  | 1068     |         |
| S <sub>b,sym</sub>                                                 | 2840 | 4.6   | 0.1   | 0.0  | -20.6 | 0.8  | -37.5 | -0.2  | 0.0  | 0.0  | -22.4 | 0.0  | -1.1  | -3.7 | 0.0  | 3.9      | 1042    |
| S <sub>f,sym</sub>                                                 | 3331 | -53.1 | 0.0   | 0.0  | 35.8  | 2.0  | -5.7  | 0.0   | 0.0  | 0.0  | -30.2 | 0.0  | -1.0  | 7.3  | 0.0  | -2.0     | 139     |
| S <sub>f,asym</sub>                                                | 3393 | -0.1  | 0.0   | 0.0  | -2.1  | 46.3 | 2.1   | -38.4 | 0.0  | 0.0  | 0.6   | 0.0  | -11.2 | 0.0  | 0.0  | 0.1      | 96      |

<sup>a</sup> Notations for NH vibrational modes: u, umbrella; x, scissoring; S<sub>sym</sub>, totally symmetric NH stretching; S<sub>b</sub>, H-bonded NH stretching (S<sub>b,sym</sub> for symmetric and S<sub>b,asym</sub> for asymmetric); S<sub>f</sub>, free NH stretching (S<sub>f,sym</sub> for symmetric and S<sub>f,asym</sub> for asymmetric).

**Table S9.** The original frequencies (in  $\text{cm}^{-1}$ ) of NH stretching fundamentals and bending overtones, the coupling constants (in  $\text{cm}^{-1}$ ) between them, and the original IR intensities of stretching fundamentals (in  $\text{km/mol}$ ) that involved in Fermi resonance in  $\text{NH}_4^+ \dots (\text{NH}_3)_n$  clusters.<sup>a</sup>

| $\text{NH}_4^+ \dots (\text{NH}_3)_2$ |      | uu    |       |       |       |       |       | ux    |      |       |       |       |       | xx   |      |      | Original<br>IR int. |
|---------------------------------------|------|-------|-------|-------|-------|-------|-------|-------|------|-------|-------|-------|-------|------|------|------|---------------------|
|                                       |      | 2860  | 2903  | 2944  | 2996  | 3037  | 3129  | 3146  | 3159 | 3188  | 3199  | 3281  | 3290  | 3434 | 3447 | 3456 |                     |
| $S_{b,\text{asym}}$                   | 2279 | -1.3  | -56.5 | 1.5   | 0.0   | 0.1   | -0.9  | -22.6 | -1.1 | 1.2   | 0.1   | -0.7  | 17.1  | -0.3 | 0.0  | -0.2 | 2917                |
| $S_{b,\text{sym}}$                    | 2374 | 1.7   | 2.0   | 8.6   | 0.1   | 0.0   | -34.3 | 0.9   | 0.0  | 14.4  | 0.6   | 0.0   | -0.1  | 1.4  | 0.0  | 0.1  | 1005                |
| $S_{f,\text{sym}}$                    | 3314 | 41.6  | 0.0   | 36.1  | -0.1  | 0.0   | 4.0   | -0.5  | 0.0  | -29.0 | -1.2  | 0.0   | -0.3  | -5.3 | 0.0  | -3.8 | 74                  |
| $S_{f,\text{asym}}$                   | 3380 | 0.0   | -0.2  | 0.0   | -0.1  | -39.3 | 0.0   | -1.2  | 29.1 | 0.0   | -0.1  | -11.4 | -0.4  | 0.0  | 0.1  | 0.0  | 77                  |
| $\text{NH}_4^+ \dots (\text{NH}_3)_3$ |      | uu    |       |       |       |       |       | ux    |      |       |       |       |       | xx   |      |      | Original<br>IR int. |
|                                       |      | 2961  | 2962  | 2962  | 3036  | 3036  | 3109  | 3224  | 3223 | 3223  | 3224  | 3297  | 3297  | 3483 | 3489 | 3488 |                     |
| $S_{b,\text{asym}}$                   | 2684 | -2.8  | 37.4  | -3.5  | 13.4  | 32.9  | 1.6   | 1.9   | 19.1 | -18.9 | 2.0   | -0.7  | 18.9  | -0.3 | -0.4 | 0.3  | 1938                |
| $S'_{b,\text{asym}}$                  | 2684 | -0.2  | -3.6  | -37.1 | -32.3 | 12.9  | -1.5  | -18.0 | 1.6  | -1.5  | -18.3 | 17.8  | 0.2   | 0.2  | 0.2  | 0.4  | 1938                |
| $S_{b,\text{sym}}$                    | 2719 | 27.7  | 2.7   | 0.1   | 2.0   | 1.0   | -35.6 | -5.1  | 2.9  | 1.3   | 6.7   | -0.7  | 0.8   | 4.3  | 0.1  | 0.0  | 285                 |
| $S_f$                                 | 3360 | -40.3 | -1.4  | 1.7   | 0.0   | 0.0   | -15.8 | -19.4 | 6.8  | 6.8   | 19.4  | 0.0   | 0.0   | -3.1 | -0.1 | 0.0  | 64                  |
| $\text{NH}_4^+ \dots (\text{NH}_3)_4$ |      | uu    |       |       |       |       |       | ux    |      |       |       |       |       | xx   |      |      | Original<br>IR int. |
|                                       |      | 3033  | 3035  | 3035  | 3034  | 3035  | 3036  | 3280  | 3280 | 3280  | 3280  | 3280  | 3280  | 3521 | 3528 | 3528 |                     |
| $S_{b,\text{sym}}$                    | 2885 | 51.4  | -0.8  | 0.3   | 0.1   | -0.2  | -1.1  | -0.2  | 0.3  | -0.2  | -0.1  | -0.5  | -0.4  | 6.4  | 0.0  | -0.1 | 1                   |
| $S_{b,\text{asym}}$                   | 2896 | -0.8  | 8.1   | 20.4  | 7.3   | -19.1 | -37.9 | -19.2 | 3.7  | -21.0 | 8.9   | 9.5   | 9.7   | 0.0  | 0.0  | 0.0  | 1359                |
| $S'_{b,\text{asym}}$                  | 2896 | -0.4  | -33.8 | 18.8  | -1.2  | -25.2 | 15.3  | -3.2  | 21.3 | 6.0   | -21.1 | 7.8   | 9.0   | 0.0  | 0.0  | 0.0  | 1359                |
| $S''_{b,\text{asym}}$                 | 2895 | 1.0   | 33.8  | 14.6  | -11.3 | -19.1 | 22.6  | -8.5  | 11.5 | -8.2  | -3.9  | -21.8 | -17.6 | 0.1  | 0.0  | 0.0  | 1358                |

<sup>a</sup> Notations for NH vibrational modes: u, umbrella; x, scissoring;  $s_b$ , H-bonded NH stretching ( $s_{b,\text{sym}}$  for symmetric and  $s_{b,\text{asym}}$  for asymmetric);  $s_f$ , free NH stretching ( $s_{f,\text{sym}}$  for symmetric and  $s_{f,\text{asym}}$  for asymmetric).
